# Supplementary material
Source: PubMed Central journal article supplement (PMC8756530)
Supplement: mmc3.pdf [file mmc3.pdf]

# Common deletion variants causing protocadherin- $\alpha$ deficiency contribute to the complex genetics of BAV and left-sided congenital heart disease

Polakit Teekakirikul,<sup>1,2</sup> Wenjuan Zhu,<sup>2</sup> George C. Gabriel,<sup>1</sup> Cullen B. Young,<sup>1</sup> Kyliia Williams,<sup>1</sup> Lisa J. Martin,<sup>3</sup> Jennifer C. Hill,<sup>4</sup> Tara Richards,<sup>4</sup> Marie Billaud,<sup>4</sup> Julie A. Phillippi,<sup>4</sup> Jianbin Wang,<sup>5</sup> Yijen Wu,<sup>1</sup> Tuantuan Tan,<sup>1</sup> William Devine,<sup>1</sup> Jiuann-huey Lin,<sup>6</sup> Abha S. Bais,<sup>1</sup> Jonathan Klonowski,<sup>1</sup> Anne Moreau de Bellaing,<sup>1,7</sup> Ankur Saini,<sup>1</sup> Michael X. Wang,<sup>1</sup> Leonid Emerel,<sup>4</sup> Nathan Salamacha,<sup>1</sup> Samuel K. Wyman,<sup>1</sup> Carrie Lee,<sup>2</sup> Hung Sing Li,<sup>2</sup> Anastasia Miron,<sup>8</sup> Jingyu Zhang,<sup>9</sup> Jianhua Xing,<sup>9</sup> Dennis M. McNamara,<sup>10</sup> Erik Fung,<sup>2,11</sup> Paul Kirshbom,<sup>12</sup> William Mahle,<sup>13</sup> Lazaros K. Kochilas,<sup>13</sup> Yihua He,<sup>14</sup> Vidu Garg,<sup>15</sup> Peter White,<sup>16</sup> Kim L. McBride,<sup>15</sup> D. Woodrow Benson,<sup>17</sup> Thomas G. Gleason,<sup>18</sup> Seema Mital,<sup>8</sup> and Cecilia W. Lo<sup>1,\*</sup>

## Summary

Bicuspid aortic valve (BAV) with ~1%–2% prevalence is the most common congenital heart defect (CHD). It frequently results in valve disease and aorta dilation and is a major cause of adult cardiac surgery. BAV is genetically linked to rare left-heart obstructions (left ventricular outflow tract obstructions [LVOTOs]), including hypoplastic left heart syndrome (HLHS) and coarctation of the aorta (CoA). Mouse and human studies indicate LVOTO is genetically heterogeneous with a complex genetic etiology. Homozygous mutation in the *Pcdha* protocadherin gene cluster in mice can cause BAV, and also HLHS and other LVOTO phenotypes when accompanied by a second mutation. Here we show two common deletion copy number variants (delCNVs) within the *PCDHA* gene cluster are associated with LVOTO. Analysis of 1,218 white individuals with LVOTO versus 463 disease-free local control individuals yielded odds ratios (ORs) at 1.47 (95% confidence interval [CI], 1.13–1.92;  $p = 4.2 \times 10^{-3}$ ) for LVOTO, 1.47 (95% CI, 1.10–1.97;  $p = 0.01$ ) for BAV, 6.13 (95% CI, 2.75–13.7;  $p = 9.7 \times 10^{-6}$ ) for CoA, and 1.49 (95% CI, 1.07–2.08;  $p = 0.019$ ) for HLHS. Increased OR was observed for all LVOTO phenotypes in homozygous or compound heterozygous *PCDHA* delCNV genotype comparison versus wild type. Analysis of an independent white cohort (381 affected individuals, 1,352 control individuals) replicated the *PCDHA* delCNV association with LVOTO. Generalizability of these findings is suggested by similar observations in Black and Chinese individuals with LVOTO. Analysis of *Pcdha* mutant mice showed reduced *PCDHA* expression at regions of cell-cell contact in aortic smooth muscle and cushion mesenchyme, suggesting potential mechanisms for BAV pathogenesis and aortopathy. Together, these findings indicate common variants causing *PCDHA* deficiency play a significant role in the genetic etiology of common and rare LVOTO-CHD.

## Introduction

Bicuspid aortic valve (BAV) is the most common congenital heart defect (CHD), exhibiting 1%–2% prevalence in the general population.<sup>1</sup> It is a structural heart defect resulting from maldevelopment of the aortic valve such that only two functional valve leaflets are formed instead of the normal tricuspid aortic valve (TAV).<sup>2</sup> BAV in isola-

tion is largely benign during early life and may remain undiagnosed until clinical presentation with aortic valve dysfunction or aorta dilation in later adult life. Given its prevalence, BAV is a major cause for adult cardiac surgery, accounting for more than 50% of valve replacement surgery.<sup>3</sup> Approximately 25% of individuals with BAV will require aorta surgery, and 50%–75% will require aortic valve replacement.<sup>4,5</sup> The surgical management of BAV is

<sup>1</sup>Department of Developmental Biology, University of Pittsburgh School of Medicine, Pittsburgh, PA, USA; <sup>2</sup>Centre for Cardiovascular Genomics and Medicine, Division of Cardiology, and Division of Medical Sciences, Department of Medicine and Therapeutics, Chinese University of Hong Kong, Hong Kong SAR, China; <sup>3</sup>Division of Human Genetics, Cincinnati Children's Hospital Medical Center, and Department of Pediatrics, University of Cincinnati School of Medicine, Cincinnati, OH, USA; <sup>4</sup>Department of Cardiothoracic Surgery and Department of Bioengineering, McGowan Institute for Regenerative Medicine, and Center for Vascular Remodeling and Regeneration, University of Pittsburgh, Pittsburgh, PA, USA; <sup>5</sup>School of Life Sciences, Tsinghua University, Beijing, China; <sup>6</sup>Department of Critical Care Medicine, University of Pittsburgh School of Medicine, Pittsburgh, PA, USA; <sup>7</sup>Department of Pediatric Cardiology, Necker-Sick Children Hospital and University of Paris Descartes, Paris, France; <sup>8</sup>Division of Cardiology, Labatt Family Heart Centre, Department of Pediatrics, The Hospital for Sick Children, University of Toronto, Toronto, ON, Canada; <sup>9</sup>Department of Computational and Systems Biology, University of Pittsburgh School of Medicine, Pittsburgh, PA, USA; <sup>10</sup>Heart and Vascular Institute, University of Pittsburgh Medical Center, Pittsburgh, PA, USA; <sup>11</sup>Laboratory for Heart Failure and Circulation Research, Li Ka Shing Institute of Health Sciences, Prince of Wales Hospital, CARE Programme, Lui Che Woo Institute of Innovative Medicine, and Gerald Choa Cardiac Research Centre, Chinese University of Hong Kong, Hong Kong SAR, China; <sup>12</sup>Sanger Heart & Vascular Institute, Charlotte, NC, USA; <sup>13</sup>Department of Pediatrics, Emory University School of Medicine and Children's Healthcare of Atlanta, Atlanta, GA, USA; <sup>14</sup>Department of Ultrasound, Beijing Anzhen Hospital, Capital Medical University, Beijing, China; <sup>15</sup>Center for Cardiovascular Research, The Heart Center, Nationwide Children's Hospital and Department of Pediatrics, The Ohio State University College of Medicine, Columbus, OH, USA; <sup>16</sup>The Institute for Genomic Medicine, Center for Cardiovascular Research, Nationwide Children's Hospital and Department of Pediatrics, Ohio State University College of Medicine, Columbus, OH, USA; <sup>17</sup>Department of Pediatrics, Medical College of Wisconsin, Milwaukee, WI, USA; <sup>18</sup>Division of Cardiac Surgery, Department of Surgery, Brigham and Women's Hospital and Harvard Medical School, Boston, MA, USA

\*Correspondence: [cel36@pitt.edu](mailto:cel36@pitt.edu)

<https://doi.org/10.1016/j.xhgg.2021.100037>

© 2021 The Authors. This is an open access article under the CC BY-NC-ND license (<http://creativecommons.org/licenses/by-nc-nd/4.0/>).

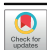

challenging, as the pathogenic mechanism for BAV-associated aortopathy remains unknown.

Familial studies have identified a genetic etiology for BAV.<sup>6–9</sup> These studies have also shown BAV is closely associated with less common CHDs involving other defects on the left side of the heart, such as coarctation of the aorta (CoA; prevalence of 0.04%) and hypoplastic left heart syndrome (HLHS; prevalence of 0.02%).<sup>10</sup> Collectively, these malformations are referred to as left ventricular outflow tract obstructions (LVOTOs). Thus, family members of probands with either BAV or HLHS may have isolated BAV, CoA, or other LVOTO lesions. Together, these findings suggest a broad spectrum of LVOTO is genetically related. LVOTO also has been shown to be genetically heterogeneous and characterized by reduced penetrance, such that subjects carrying a known pathogenic mutation may not have disease, and variable expressivity in which different disease phenotypes may be associated with the same mutation.<sup>11</sup> These findings suggest LVOTO is mediated by complex genetics, with familial studies providing data supporting an oligogenic/digenic model of disease.<sup>9,12–14</sup>

Currently, only a few genes have been suggested to cause BAV. They include rare pathogenic variants in genes such as *NOTCH1*, *SMAD6*, or *ROBO4*, all recovered from familial studies with evidence of incomplete penetrance and variable expressivity.<sup>15–19</sup> A recent study leveraging the close ancestry of subjects in Iceland also identified a rare pathogenic *MYH6* coding variant linked to CoA and likely BAV.<sup>20</sup> Analysis of 8 mutant mouse lines exhibiting HLHS and other LVOTO phenotypes recovered from a large-scale mouse mutagenesis screen has confirmed the genetic heterogeneity of LVOTO.<sup>21,22</sup> The finding of non-Mendelian transmission in these HLHS mouse models also supports complex genetics.<sup>22</sup> Analysis of one such mouse line, *Ohia*, identified a mutation in *Pcdha9*, a protocadherin gene mediating cell-cell adhesion, to cause BAV.<sup>21</sup> When accompanied by a second mutation in the chromatin modifying protein *Sap130*, HLHS and other LVOTO lesions are observed.<sup>21</sup>

The finding of a role for *Pcdha9* in HLHS/LVOTO was notable, given a previous report of a common 16.8 kb deletion copy number variant (delCNV) spanning *PCDHA8-10* in the human genome.<sup>23</sup> The prevalence of this delCNV varied by race (Minor Allele Frequency (MAF), 0.11–0.033), being most common in white individuals, less common in Black individuals, and least common in Asian individuals. This similarity to the racial prevalence of BAV suggested a possible genetic link between the *PCDHA* delCNV and BAV and perhaps other closely associated LVOTOs.<sup>24,25</sup> This was investigated in the present study with the recruitment of a large discovery cohort of white subjects with LVOTO. Replication analysis was conducted in independent cohorts of white, Black, and Chinese LVOTO subjects. Using the *Pcdha9* mutant mice, we further explored potential developmental mechanisms of heart malformation.

These studies differ from traditional approaches for investigating the genetic causes of CHD, which typically

focus on rare variants in genes causing CHD. Alternatively, common variants are investigated and used to track and identify genomic regions linked to disease in genome-wide association studies. In the latter instance, the common variants typically found in noncoding intergenic regions serve merely as markers for tracking genomic regions linked to disease. In contrast, our study investigated common variants in the *PCDHA* gene cluster as possible disease alleles that can cause BAV/LVOTO. These studies are motivated by findings from the *Ohia* mouse model showing *Pcdha9* deficiency can cause BAV/LVOTO and supported by the observation that a common *PCDHA* delCNV has a racial prevalence that mirrors the racial prevalence of BAV.

## Material and methods

### Human study participants

This study was performed in accordance with the Declaration of Helsinki for the ethical conduct of research involving human subjects. Ethics approval was obtained from the institutional ethics committee of each participating institution, with written informed consent obtained from all participants or from the parent of minor participants. Adult and pediatric cases for the white discovery cohort were recruited from several institutions (Table S1), including the University of Pittsburgh Medical Center (UPMC) for Thoracic Aortic Disease, Children's Hospital of Pittsburgh (CHP), Hospital for Sick Children (Sickkids), Nationwide Children's Hospital (NCH), Cincinnati Children's Hospital Medical Center (CCHMC), and Children's Healthcare of Atlanta. The Chinese cohort was recruited from the Chinese University of Hong Kong and Beijing Anzhen Hospital.

The pediatric LVOTO cases included isolated or complex BAV, CoA, HLHS, or other LVOTO as defined in Tables S2 and S3. Adult individuals with isolated BAV were either from clinic-based recruitment (UPMC Center for Thoracic Aortic Disease) or family-based recruitment from screening relatives of pediatric LVOTO probands (only one subject per family) (Table S1). In total, 1,322 individuals with LVOTO were recruited, comprising 1,218 white and 104 Chinese (self-reported) subjects. We also recruited 976 local control subjects comprising 463 white adult subjects from UPMC Heart and Vascular Institute and 513 Chinese adult subjects from the Chinese University of Hong Kong (Table S1). All control subjects had echocardiographic or magnetic resonance imaging (MRI) examination confirming normal TAV with no CHD. For replication analysis, whole-exome sequencing (WES) data were obtained for white LVOTO subjects from the Pediatric Cardiac Genomics Consortium (PCGC).<sup>26,27</sup> This analysis was conducted using WES data from the Framingham Heart Study (FHS) as an independent control population.<sup>28</sup> While BAV was not curated in the FHS, valve and/or aorta surgeries were recorded, allowing removal of these individuals to minimize the inclusion of BAV subjects.

### *PCDHA* delCNV genotype determination

#### Multiplexed PCR genotyping

The *PCDHA* delCNV genotypes were determined using a multiplexed PCR assay. For the wild-type and  $\Delta$ 16.8 allele, PCR was performed according to a previously published protocol that yielded a wild-type PCR product of 469 bp and a 16.8 kb delCNV (nsv4655880) PCR product of 554 bp.<sup>23</sup> Similarly, multiplexed PCR was performed to detect the wild-type and 13.6 kb *PCDHA*

del CNV (nsv4684081). Primers for these PCR reactions are shown in Table S4, and PCR reactions were conducted using 60°C annealing temperature. The wild-type PCR product generated is 1,440 bp, and the 13.6 kb del CNV PCR product is approximately 2,500–3,000 bp. The PCR genotyping protocols were validated with demonstration that the delCNV genotype calls obtained from the WES data available for 166 CHP and 89 Sickkids individuals with LVOTO matched those obtained by PCR analysis performed by independent laboratories in CHP and Sickkids.

#### **PCDHA delCNV genotyping using WES and whole-genome sequencing (WGS) data**

WES data were analyzed from 166 CHP subjects, 89 Sickkids subjects, Chinese pediatric and PCGC LVOTO subjects (database for Genotype and Phenotype [dbGAP]: phs001194.v2.p2), and FHS subjects (FHS, dbGaP: phs000007.v30.p11). The alignment BAM files were generated by mapping the sequencing reads to the reference genome (GRCh38) with BWA-MEM v.0.7.17, with further processing using the GATK Best Practices workflows (GATK v.4.0.8.1).<sup>29–31</sup> Plink v.1.9<sup>32</sup> was used to identify and remove cryptic relatedness in Framingham and PCGC cohorts using methods previously described.<sup>33</sup> Briefly, second-degree or closer relatives with shared ancestry with PI\_HAT > 0.25 were removed, such that only unrelated individuals were used for downstream analyses.

For analysis of the delCNV genotypes, depth information directly extracted from BAM files was used to determine the 16.8/13.6 kb delCNV genotype by visually reviewing the depth distribution across the region encompassing the overlapping 16.8 kb and 13.6 kb deletion intervals in each subject (Figures S1A–S1E). The CHP and Sickkids samples were further analyzed by multiplexed PCR, which yielded consistent results, confirming accuracy of the WES-determined genotypes. For analysis of whole-genome sequencing data from the 1000 Genomes Project (1KG), depth information of positions spanning 16.8 kb and 13.6 kb deletion intervals were directly extracted from joint-calling VCF files downloaded from the 1KG website.<sup>34</sup> The allele frequency observed for the top CNVs in the *PCDHA* cluster is shown in Figure S2C. Similar visual inspection of coverage depth in the whole-genome sequencing data was used to determine the 16.8/13.6 kb delCNV genotypes in subjects from the 1KG (Figures S1F–S1J).

#### **Ancestral identification using principal component analysis**

Germline single-nucleotide variants (SNVs) and small indels (InDels) from WES data of subjects in the Pittsburgh, PCGC, and FHS cohorts were jointly called from BAM files using GATK HaplotypeCaller, and variants that pass filtering based on GATK4 best practices, have a cohort MAF > 0.05, and have MAF > 0.1 across non-Finnish European samples in gnomAD exome v.2.1 were considered high-quality common variants.<sup>26–29,31,35</sup> To find white samples with ancestry similar to Pittsburgh subjects in the PCGC and FHS cohorts, genotypes of these common variants were extracted, and principal component analysis (PCA) was performed with Smartpca in EIGENSOFT v.6.1.4.<sup>36,37</sup> White subjects were extracted with PC1 < -0.003 and PC2 < 0.018 and ggplot2 via a centroid delineated ellipse encompassing most of the white subjects in the Pittsburgh cohort in the PCA plot of PC1 versus PC3 (Figure S3). PCGC and FHS subjects within this ellipse are considered white subjects with ancestry similar to the Pittsburgh cohort (Figure S3) and were used for further association analyses. Black

samples from Pittsburgh and PCGC were directly extracted with PC1 > 0.015 and were used for downstream analyses.

#### **PCDHA9 pathogenic variant detection**

To obtain potentially pathogenic variants in *PCDHA9*, variants including SNVs and InDels were extracted from joint-calling variant files generated by above analyses and annotated by Annovar.<sup>38</sup> High-quality variants were recovered that: (1) passed GATK Variant Score Quality Recalibration (VSQR); (2) have minimum 5 supported reads; (3) have genotype quality  $\geq 20$  or 60 for SNVs or InDels, respectively; (4) SNVs or InDels not within 10 bp or 5 bp, respectively, of an indel were removed to eliminate false positives from mismatched reads from repetitive genomic sequences. This latter filter had no impact on the variants recovered.

We noted no *PCDHA9* high-quality variants were recovered with MAF < 0.005 across non-Finnish European samples in gnomAD exome v.2.1.1.<sup>35</sup> These were further filtered to identify potentially pathogenic variants, defined as loss-of-function (LoF) mutations (nonsense, canonical splice-site, frameshift indels, and start loss), inframeshift indels, and predicted deleterious missense mutation (D-Mis), that were called damaging by at least 6 of 9 prediction algorithms (SIFT, PolyPhen2\_HDIV, LRT, MutationTaster, MutationAssessor, FATHMM, PROVEAN, MetaSVM, M\_CAP annotated using dbNSFP v.3.5a), with CADD score > 20 and GERP++ > 2.<sup>39</sup>

#### **Pcdha9 mutant mouse breeding and BAV phenotyping**

Mouse studies were conducted under an animal study protocol approved by the University of Pittsburgh Institutional Animal Care and Use Committee. The *Pcdha9* (c.2389\_2399del; [p.Asp796Phefs\*]) mutant mice generated by CRISPR gene editing were maintained in the C57BL/6J background.<sup>21</sup> *Pcdha9* mutant mouse embryos at embryonic day 14.5 (E14.5) or term were analyzed for BAV using histological analysis with episcopic confocal microscopy.<sup>21</sup> For immunofluorescence microscopy, embryos were cryoembedded (see below). BAV diagnosis in adult mice was determined by cardiac MRI (CMR). *In vivo* cardiac MRI was carried out on a Bruker Biospec 7T/30 system (Bruker Biospin MRI, Billerica, MA, USA) with the 35-mm quadrature coil for both transmission and reception. Free-breathing no-gating cine MRI with retrospective navigators was acquired with the Bruker IntraGate module. Multi-planar short-axis, 2-chamber and 4-chamber long-axis cine MRI covering the whole heart volume was acquired with the following parameters: field of view (FOV) = 2.5 cm × 2.5 cm, slice thickness = 1 mm, in-plane resolution = 0.97  $\mu$ m, flip angle (FA) = 30 degrees, echo time (TE) = 1.872 ms, repetition time (TR) = 38.293 ms; FOV = 1.8 cm × 1.8 cm, slice thickness = 0.8 mm, in-plane resolution = 0.070 mm, FA = 30 degrees, TE = 1.872 ms, TR = 38.293 ms, 50 cardiac phases with equivalent temporal resolution around 6 ms per time frame.

#### **Analysis of protein expression with immunostaining and confocal imaging**

Wild-type C57BL/6J and homozygous *Pcdha9* mutant embryos were obtained at E14.5. The embryos were fixed in 4% paraformaldehyde and processed for cryoembedding. Frozen sections were collected for immunostaining. Cryosections of mouse embryonic heart tissue were immunostained with rabbit anti-alpha-protocadherin antibody (190003, Synaptic Systems, 1:500), goat anti-PECAM-1 antibody (sc-1506, Santa Cruz Biotechnology, 1:500), and mouse anti-alpha smooth muscle actin antibody (1A4)

(ab7817, Abcam, 1:500). Human adult aortic tissues were stained with the alpha-protocadherin antibody and also imaged for elastin autofluorescence. Secondary antibodies included goat anti-rabbit IgG (Invitrogen, #A21429, 1:1,000) and goat anti-mouse IgM (Invitrogen, #A21042, 1:1,000). DAPI was used to label nuclei (D1306, Invitrogen). Sections were imaged with confocal microscopy and quantitatively analyzed with ImageJ.<sup>40</sup>

### Human aortic tissue transcript analysis

RNA was isolated from the medial layer of human aortic tissues from individuals with BAV and TAV who underwent aortic valve replacement surgery at the UPMC Center for Thoracic Aorta Disease. For human gene expression analysis, after cDNA was prepared, real-time PCR was performed for transcripts from *PCDHA7–11* using Power SYBR Green PCR Master Mix (Applied Biosystems) on an ABI 7900HT Fast Real Time PCR system. *Gapdh* was used to normalize the expression data. Primers used for this analysis are shown in Table S4.

### Pcdha9 siRNA knockdown analysis

Mouse mammary gland cell line (NMuMg) was cultured in 12-well plates for gene knockdown analysis. *Pcdha9* small interfering RNA (siRNA) (Santa Cruz, #sc-106386) and negative control siRNA (Santa Cruz, #sc-37007) were delivered into NMuMg cells by transfection (FuGeneHD, Promega). 24 h after siRNA treatment, cells were treated with recombinant TGF- $\beta$ 1 (4 ng/mL, CellSignaling, #8915) and harvested at day 3. Three independent experiments were performed. For mRNA analysis, total RNA isolated using Trizol (Invitrogen) was reverse transcribed. Quantitative real-time PCR was used to analyze transcripts for *Notch1*, *Postn*, *Rac1*, *Snai1*, *Tgfb1*, and *Tgfb2*. *Gapdh* was used as internal control. Primers used for this analysis are shown in Table S4.

### Bioinformatic analysis of RNA sequencing data from human fetal heart

Single-cell RNA-sequencing (RNA-seq) data of human embryos spanning 5 to 20 weeks of gestation from a previously published study were used to examine expression of genes in the *PCDHA* gene cluster.<sup>41</sup> The gene-cell UMI (unique molecular identifier) count sparse matrix of single-cell RNA-seq data was directly downloaded from GEO database under GEO: GSE106118. Cell type annotation was obtained from the original publication.<sup>41</sup> The sum of UMI counts for each cell was normalized to 10,000 and then log-transformed. A total of 2,500 cardiac cells were used for these analyses.

### Statistics

For the CNV allelic and genotypic association tests, we conducted 2  $\times$  2 Pearson's chi-square test (or Fisher's exact test if the cell frequency was <5), and odds ratio (OR) with 95% confidence interval (CI) was calculated for each association test. As both the 13.6 and 16.8 kb *PCDHA* delCNV eliminated *PCDHA9*, primary analyses considered both delCNVs. Secondary analyses considered each delCNV separately. Sex-adjusted allelic association tests were performed using logistic regression (plink2-glm sex-ci 0.95).<sup>32</sup> Sex-adjusted genotypic association was conducted using MASS R package (glm[PHENOTYPE-1~GENO+SEX,data,family = binomial]).<sup>42</sup> While our primary analysis focused on the entirety of the LVOTO cohort compared to control subjects, we also conducted additional subanalyses to evaluate whether specific LVOTO phenotypes were driving the association with the *PCDHA* delCNVs. The animal experiments were not randomized; however, the investigators were

blinded to the identity of the samples. In the mouse studies, comparison was conducted with unpaired Student's t test. p values for t tests are reported in the respective figures, and p < 0.05 was considered statistically significant. All values are shown either as mean  $\pm$  SEM (standard error of the mean) or as mean  $\pm$  SD (standard deviation). Statistical analysis was performed using SPSS, SAS, or R package.

## Results

### Individuals in the discovery cohort and *PCDHA* deletion CNV analysis

We recruited 1,218 white subjects in a discovery cohort of individuals with LVOTO from Pittsburgh, Columbus, Cincinnati, Atlanta, and Toronto. This included pediatric individuals with BAV, CoA, HLHS, and other LVOTO phenotypes (n = 927), and also adult individuals with isolated BAV (n = 291) (Figures 1C–1F) (Table S5). In addition, 463 local control subjects were recruited from Pittsburgh, comprising white adult subjects all clinically confirmed to have normal cardiac anatomy with the same rigorous phenotype characterization as the case group with echocardiography or cardiac MRI.

PCR genotyping was conducted to identify those carrying the known common 16.8 kb *PCDHA* delCNV (nsv4655880) and an additional less-common overlapping 13.6 kb delCNV (nsv4684081) discovered during the course of this study (Figures 2A and 2B).<sup>23</sup> The protocadherin gene cluster comprises 15 variable exons, each transcribed from its own promoter and spliced to the same three terminal exons (Figure 2A).<sup>43</sup> The 16.8 kb delCNV deletes variable exons spanning *PCDHA8–10*, while the 13.6 kb delCNV removes *PCDHA7–9* (Figure 2B). Hence, the two delCNVs share the common loss of *PCDHA8* and *PCDHA9*. As WES was available on 166 of the individuals with LVOTO from Pittsburgh, we were able to confirm fidelity of the genotyping protocol in detection of both the 16.8 and 13.6 kb *PCDHA* delCNVs.

### Significant association of common *PCDHA* deletion CNV with BAV and other LVOTOS

A case-control analysis for the prevalence of the two *PCDHA* delCNVs (16.8/13.6 kb) in the discovery LVOTO cohort versus local control subjects showed apparent enrichment of the delCNV in the individuals with LVOTO. Thus, presence of the 16.8/13.6 kb delCNV ( $\Delta$ /+ or  $\Delta$ / $\Delta$ ) was observed in 21% of individuals with LVOTO versus 15.8% of control subjects (Figure 2C). Most striking was the finding that 50% of individuals with CoA had the delCNV (Figure 2C). Also interesting to note is the much higher prevalence of the  $\Delta$ / $\Delta$  genotype. While this was seen in only 0.2% of control subjects, it was observed in 2.1% of individuals with LVOTO, including 2.8% of those with HLHS and 9.1% with CoA (Figure 2C).

To investigate the role of the *PCDHA* delCNVs in LVOTO, we conducted an allelic association analysis of the 13.6 kb and 16.8 kb *PCDHA* delCNV. Adjustment for

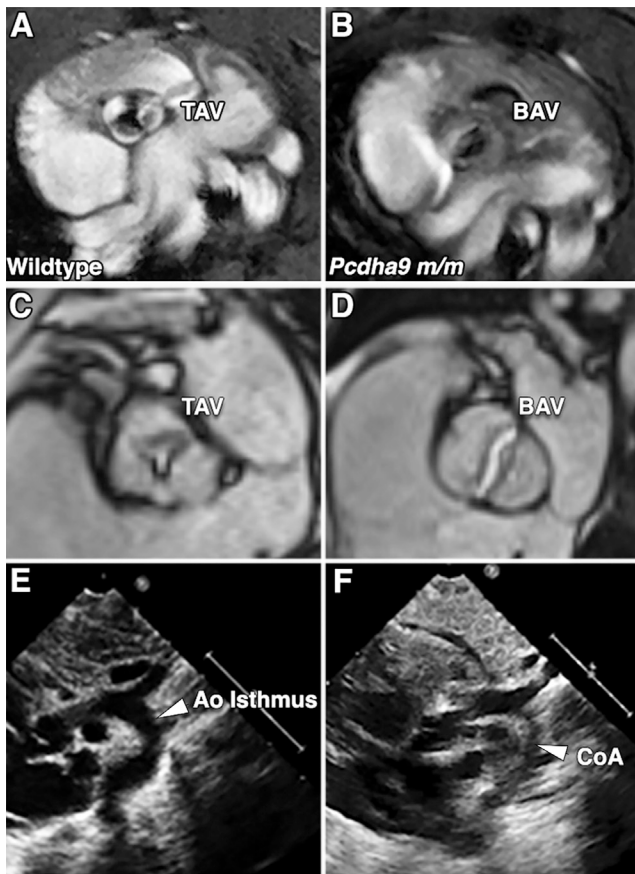

**Figure 1. Human and mouse LVOTO phenotypes**

(A–D) Cardiac MRI showed TAV (A and C) and BAV (B and D) in homozygous *Pcdha9* mutant mice (A and B) and in adult human subjects (C and D). TAV is characterized by three distinct cusps with three distinct Y-shaped closure lines (A and C), whereas BAV has the two cusps forming a single valve coaptation line with thickened leaflets (B and D).

(E and F) Two-dimensional (2D) transthoracic echocardiogram in suprasternal view shows subject with normal arch (E) and a CHD individual with severe CoA (F).

TAV, tricuspid aortic valve; BAV, bicuspid aortic valve; Ao isthmus, aortic isthmus; CoA, coarctation of aorta.

sex was carried out to account for the greater proportion of males observed among individuals with LVOTO.<sup>44</sup> In the control cohort, the 16.8 kb delCNV has MAF of 0.077, while the 13.6 kb delCNV is less frequent, with MAF of 0.003 (Table S5). The 13.6/16.8 kb delCNV alleles combined showed significant association, with OR of 1.47 (95% CI, 1.13–1.92) ( $p = 4.2 \times 10^{-3}$ ) for all LVOTOs combined, 1.47 (95% CI, 1.10–1.97) ( $p = 0.01$ ) for isolated BAV, 6.13 (95% CI, 2.75–13.69) ( $p = 9.7 \times 10^{-6}$ ) for isolated CoA, and 1.49 (95% CI, 1.07–2.08) ( $p = 0.019$ ) for HLHS (Table S5A; Figure 2C). Allelic association analysis conducted separately for the 16.8 kb or 13.6 kb delCNV showed each CNV was significantly associated with LVOTO. Higher OR (3.9) was observed for the 13.6 kb delCNV as compared to the 16.8 kb (OR, 1.36) or 13.6/16.8 kb delCNV (OR, 1.47) combined (Figure 3A; Table S5). This likely reflects the much lower prevalence of the 13.6 kb delCNV. Among the LVOTO phenotypes, the 13.6 kb delCNV

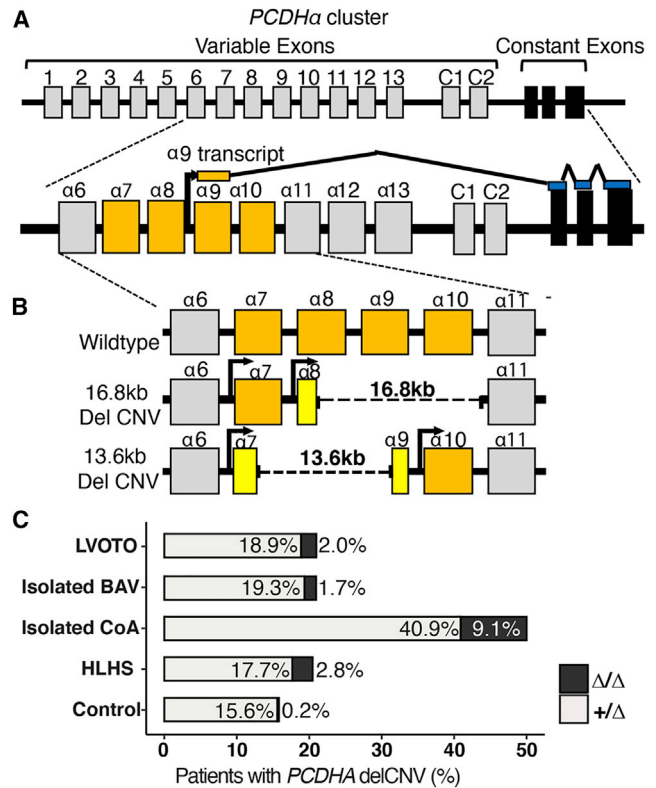

**Figure 2. Association of *PCDHA* delCNV with LVOTO**

(A) Schematic of the organization of the *PCDHA* gene cluster. The human *PCDHA* gene cluster contains 15 variable exons (gray) and 3 constant exons (black). Each gene defined by a variable exon is transcribed from its own promoter and is spliced to 3 constant exons. The variable exon encodes the extracellular domain, and the constant exons encode the common distal intracellular domain.

(B) Schematic representation of the 16.8 kb delCNV (16.8 kb dashed line) spanning  $\alpha 8$  to  $\alpha 10$ , and the ~13.6 kb delCNV (13.6 kb dashed line) spanning  $\alpha 7$  to  $\alpha 9$ . Exons that are partially deleted are represented in yellow.

(C) Bar graph showing prevalence of the 13.6 kb and 16.8 kb *PCDHA* delCNV in individuals of the white discovery cohort with different LVOTO phenotypes.

showed significant association with isolated BAV and HLHS, and the 16.8 kb delCNV showed significant association with isolated CoA (Figure 3A; Table S5).

As *Pcdha9* mutant mice with either *Pcdha9* missense or frameshift mutation (generated by CRISPR gene editing) yielded similar LVOTO phenotypes (Figures 1A and 1B), we used WES data available from 166 subjects with LVOTO from CHP to interrogate for possible coding mutations in *PCDHA9*. Analysis of the WES data showed 37 (22%) of these individuals had *PCDHA* delCNV, consistent with the PCR genotype. In three individuals, none with the *PCDHA* delCNV, three rare damaging variants were found in *PCDHA9* (Table S6). This consisted of one stop gain mutation (MAF =  $6.7 \times 10^{-5}$ ) and two missense variants predicted to be damaging by six prediction algorithms (Table S6). These findings suggest coding sequence variation in the *PCDHA* gene cluster should be further investigated for a possible role in LVOTO pathogenesis.

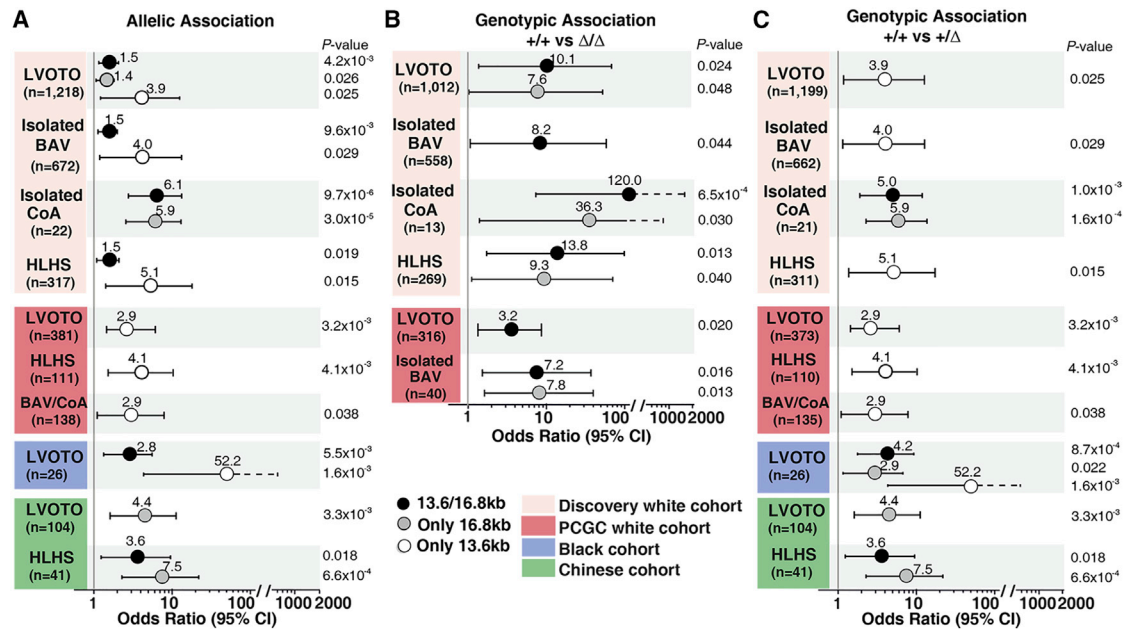

**Figure 3. Association of the *PCDHA* delCNV with LVOTO in different cohorts**

(A) Significant allelic association is observed for the *PCDHA* delCNV with LVOTO in different cohorts. The odds ratio (OR) and 95% confidence interval (CI) are shown. The total number of affected individuals analyzed is indicated. (B and C) Genotype comparisons show significant association of homozygous/compound heterozygous ( $\Delta/\Delta$ ) (B) or heterozygous ( $\Delta/+$ ) (C) genotypes with LVOTO phenotypes. The OR and 95% CI are shown. The total number of subjects analyzed with the different phenotypes is indicated.

### Impact of *PCDHA* delCNV genotype

The enrichment observed for homozygous/compound heterozygous delCNV genotypes in individuals with LVOTO suggested gene dosage may impact penetrance of LVOTO phenotypes (Figure 2C). This is supported by findings from genotype comparison of homozygous/compound heterozygous 13.6/16.8 kb delCNV ( $\Delta/\Delta$ ) versus wild-type genotypes showing significant association of the  $\Delta/\Delta$  genotypes with LVOTO, CoA, BAV, and HLHS (Figure 3B; Table S5). Compared to allelic association analysis, the ORs were higher at 8.2 (95% CI, 1.06–68.9) ( $p = 0.044$ ) for BAV, 119.98 (95% CI, 7.66–1878) ( $p = 6.5 \times 10^{-4}$ ) for isolated CoA, 13.83 (95% CI, 1.74–109.91) ( $p = 0.013$ ) for HLHS, and 10.12 (95% CI, 1.37–74.89) ( $p = 0.024$ ) for all LVOTO combined (Figure 3B; Table S5). The increased CI likely reflects the small number of  $\Delta/\Delta$  genotypes observed (Figure 3B; Table S5). These values are all substantially higher than when modeling an additive allelic effect. Further analysis of the 13.6 versus 16.8 kb delCNV individually showed significant  $\Delta/\Delta$  genotype association only with the 16.8 kb delCNV. This was observed for LVOTO, CoA, and HLHS (Figure 3B). Similar comparison of heterozygous versus wild-type genotypes showed the combined 13.6/16.8 kb delCNVs or the 16.8 kb delCNV alone showed significant association only for isolated CoA (Figure 3C; Table S5). In contrast, the 13.6 kb  $\Delta/+$  genotype, which is less frequent, showed significant association in BAV, HLHS, and all LVOTO combined (Figure 3C; Table S5). Overall, these findings indicate gene dosage effects

related to the delCNV genotype may significantly impact LVOTO disease penetrance.

To further investigate whether the delCNV genotype also may impact penetrance of adult-onset aortopathy, we investigated the *PCDHA* delCNV genotype distribution among adult isolated BAV subjects from clinic-based recruitment at the UPMC Center for Thoracic Aortic Disease versus those from family-based recruitment with the screening of relatives of pediatric LVOTO proband (only 1 per family). Homozygous 16.8 kb delCNV genotypes were observed in 5 of the clinic-based individuals, 3 with aortic aneurysm, but no homozygous genotype was found among subjects from the family-based recruitment (Table 1). The genotype distribution in the clinic-based cohort deviated significantly from Hardy-Weinberg equilibrium due to the enrichment of the homozygous delCNV ( $p = 0.019$ ). In contrast, such deviation was not observed in the family-based cohort (Table 1). These observations suggest homozygous deficiency may have more severe clinical impact. While Hardy-Weinberg deviation could reflect genotyping error, this seems unlikely, since both cohorts were genotyped in parallel, and reliability of the delCNV genotyping protocol was independently confirmed by WES analysis.

### Replication analysis in ancestry-matched white LVOTO cohort

To confirm findings in the discovery cohort, we conducted similar analysis using WES data from dbGAP for white LVOTO subjects from the PGC and white subjects from

**Table 1. Hardy-Weinberg equilibrium for *PCDHA* delCNV in BAV subjects**

| Genotype <sup>a</sup>               | Observed | Expected | Deviation |
|-------------------------------------|----------|----------|-----------|
| <b>Clinic-based BAV recruitment</b> |          |          |           |
| +/+                                 | 173      | 170      | 0.05      |
| +/ $\Delta$                         | 31       | 36.98    | 0.97      |
| $\Delta/\Delta$                     | 5        | 2.01     | 4.44      |
| Total                               | 209      | 209      | 5.46      |
| Hardy-Weinberg equilibrium p        | 0.019    |          |           |
| <b>Family-based BAV recruitment</b> |          |          |           |
| +/+                                 | 56       | 57.09    | 0.02      |
| +/ $\Delta$                         | 18       | 15.81    | 0.30      |
| $\Delta/\Delta$                     | 0        | 1.09     | 1.09      |
| Total                               | 74       | 74       | 1.42      |
| Hardy-Weinberg equilibrium p        | 0.234    |          |           |

<sup>a</sup> $\Delta$ : 16.8 or 13.6 kb *PCDHA* delCNV.

the FHS as an independent control. Related individuals were removed using Plink<sup>32</sup> (see [Material and methods](#)), and PCA was used to ancestry match the PCGC and FHS white subjects with the Pittsburgh LVOTO subjects. This resulted in the recovery of 381 PCGC LVOTO subjects and 1,352 FHS control subjects ([Figure S3](#)). Case-control analysis for the 13.6/16.8 kb delCNV, either together or individually, showed significant association of the 13.6 kb delCNV with LVOTO, with OR at 2.94 (95% CI, 1.44–6.04) ( $p = 0.0032$ ), HLHS with OR at 4.05 (95% CI, 1.56–10.50) ( $p = 0.004$ ), and BAV/CoA with OR 2.94 (95% CI, 1.06–8.12) ( $p = 0.038$ ) ([Figure 3A](#); [Table S7](#)). Further analysis with genotype comparisons showed significant association of the 13.6/16.8 kb  $\Delta/\Delta$  delCNV genotype with LVOTO with OR at 3.20 (95% CI, 1.20–8.50) ( $p = 0.020$ ) and BAV with OR at 7.18 (95% CI, 1.45–35.56) ( $p = 0.016$ ) and the 16.8 kb  $\Delta/\Delta$  delCNV genotype with isolated BAV with OR at 7.84 (95% CI, 1.56–39.49) ( $p = 0.013$ ) ([Figure 3C](#); [Table S7](#)). Analysis for  $\Delta/+$  genotype showed significant association only for the 13.6 kb delCNV. This was observed for LVOTO with OR at 2.94 (95% CI, 1.44–6.04) ( $p = 0.0032$ ), HLHS with OR at 4.05 (95% CI, 1.56–10.50) ( $p = 0.0041$ ), and BAV/CoA with OR at 2.94 (95% CI, 1.06–8.12) ( $p = 0.038$ ) ([Figure 3C](#); [Table S7](#)). Overall, these findings support the association of the *PCDHA* delCNV with LVOTO seen in the white discovery cohort.

#### ***PCDHA* delCNV in Black LVOTO cohort**

PCA analysis yielded 24 Black subjects from PCGC and 2 from the Pittsburgh cohort ([Figure S2](#)). *PCDHA* delCNVs in these 26 Black LVOTO subjects were examined using 661 African individuals from the 1KG database as control subjects, given the FHS control subjects had few Black individuals. Consistent with prior study, the *PCDHA* delCNVs in the 1KG Black subjects were at much lower prevalence,

with MAF of 0.066<sup>23</sup> ([Table S8](#)). Without cardiac imaging to exclude BAV, this MAF is likely to be inflated. Among the 1KG control subjects, 12.3% had the 13.6/16.8 kb *PCDHA* delCNV, while the delCNVs were seen in 34.6% (9) of the Black LVOTO subjects ([Table S9](#)). This indicated significant allelic association, with OR at 2.81 (95% CI, 1.35–5.81) ( $p = 0.0055$ ) ([Figure 3A](#); [Table S9](#)). Heterozygous genotype association with LVOTO was also observed, with the 13.6/16.8 delCNVs yielding OR at 4.22 (95% CI, 1.81–9.84) ( $p = 8.7 \times 10^{-4}$ ) and the 16.8 kb delCNV with OR at 2.88 (95% CI, 1.17–7.10) ( $p = 0.022$ ). These findings suggest generalizability of the association of *PCDHA* delCNVs with LVOTO in the Black as well as white populations.

#### ***PCDHA* delCNV association in Chinese LVOTO cohort**

To further assess the broader role of the *PCDHA* delCNVs on LVOTO, we investigated their association with LVOTO in the Asian population. For this analysis, we recruited 104 Chinese individuals with LVOTO, including 88 pediatric and 16 adult individuals with BAV, and genotyped them for the two *PCDHA* delCNVs ([Table S5](#)). For comparison, 513 Chinese control subjects confirmed to have normal heart structure were recruited and genotyped for the two *PCDHA* delCNVs ([Table S5](#)). We found the *PCDHA* delCNVs at much lower prevalence in the Chinese subjects. We observed a combined MAF of only 0.019 for the two *PCDHA* delCNVs in the Chinese control subjects. This was elevated to 0.038 in the LVOTO subjects ([Table S5](#)). Significant association of the 13.6 kb *PCDHA* delCNV with LVOTO was observed, with OR at 4.43 (95% CI, 1.64–12.0) ( $p = 0.0033$ ) and with HLHS at OR 7.45 (95% CI, 2.34–23.67) ( $p = 0.015$ ) ([Figure 3C](#); [Table S9](#)). For HLHS, significant allelic association was also observed for the 13.6/16.8 kb delCNV combined with OR at 3.55 (95% CI, 1.25–10.1) ( $p = 0.018$ ) ([Figure 3A](#); [Table S9](#)). Genotype association analysis showed similar findings for heterozygous genotype associations ([Figure 3C](#); [Table S9](#)). Overall, these results confirm the *PCDHA* delCNVs are also significantly associated with LVOTO in the Chinese population.

#### ***PCDHA* expression in the developing mouse aorta and aortic cushion**

The role of protocadherins in heart development has not been examined previously, although their role in brain development is well described.<sup>45–47</sup> Using an antibody to the constant region of the *Pcdha* cluster that detects protein expressed by all genes in the cluster ([Figure 2A](#)), we conducted immunostaining and confocal microscopy on sections of E14.5 wild-type mouse embryos, examining expression in the developing aorta and aortic cushions ([Figure 4A](#)).<sup>48</sup> As expected, strong immunostaining was observed at regions of cell-cell contact. This was prominently seen along the intimal side of the aortic media ([Figures 4A and 4B](#)). Immunostaining was also observed in mesenchymal cells in the aortic cushions ([Figure 3C](#)). In contrast, little or no immunostaining was observed

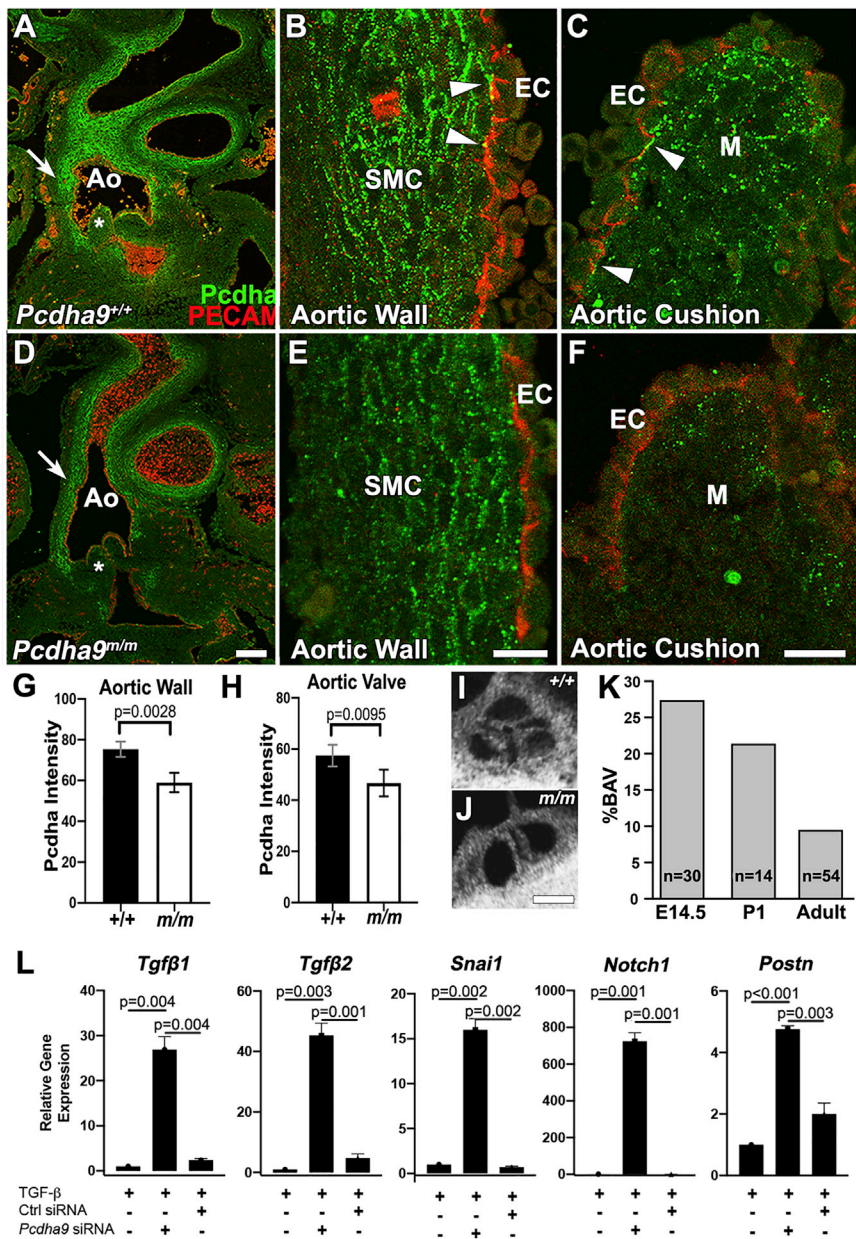

**Figure 4. PCDHA protein expression in *Pcdha9* mutant mice and knockdown of mouse *Pcdha9***

(A–C) Immunostaining and confocal imaging show PCDHA protein expression in the wild-type E14.5 mouse embryo aorta (A), with magnified views showing expression in the smooth muscle cells (SMC) on the intimal side (B), and also in mesenchyme (M) of the aortic cushion (C). Occasional staining also can be seen at the interface between the endothelial (PECAM positive) and underlying smooth muscle cells. Scale bar, 25  $\mu$ m.

(D–F) Immunostaining and confocal imaging of PCDHA protein expression in E14.5 CRISPR targeted *Pcdha9<sup>m/m</sup>* mutant embryo showed reduced immunostaining, indicating reduced PCDHA protein expression in the aorta (D). Magnified views show reduced immunostaining both in the aorta wall (E) and the aortic cushion (F). Scale bar, 25  $\mu$ m.

(G and H) Quantification of staining intensity showed reduced PCDHA protein expression in both the aorta wall (G) and the aortic cushion (H) of *Pcdha9<sup>m/m</sup>* embryos. The values shown are mean  $\pm$  SD with statistical analysis conducted using t test. (I,J) Episcopic confocal microscopy images of a tricuspid aortic valve at P1 (I) and a bicuspid aortic valve at P1 (J). (K) Percent of *Pcdha9* mutant animals found to have bicuspid aortic valve phenotype at E14.5, P1, and adult.

(L) Real-time PCR analysis shows upregulation of downstream EMT gene expression following mouse *Pcdha9* siRNA treatment and TGF $\beta$  induction in mouse mammary gland cell line (NMuMg). Control scrambled siRNA treatment and blank controls show little or no expression of EMT genes. Ao, aorta; EC, endothelial cells; +/+, wild-type; m/m, *Pcdha9*.

between endothelial cells, although occasional punctate staining was observed between aortic endothelial cells and adjacent vascular smooth muscle cells (see arrowheads in Figure 4B) or between endothelial cells of the cardiac cushions and underlying cushion mesenchyme (see arrowheads in Figure 4C).

To determine the impact of the *Pcdha9* mutation on PCDHA protein expression, similar confocal imaging analysis was conducted on aortic sections from homozygous *Pcdha9* mutant embryos carrying a functional null *Pcdha9* frameshift mutation.<sup>21</sup> These mutant embryos showed an identical pattern of PCDHA protein localization as in the wild-type embryos, but staining intensity was significantly reduced in both the aortic media and the aortic cushion mesenchyme (Figures 4D and 4E). Immunostaining between the endothelial cells and underlying smooth muscle

cells or cushion mesenchyme were markedly reduced or absent (Figures 4D and 4E). These findings suggest PCDHA deficiency in the aorta and aortic cushion can contribute to BAV and LVOTO phenotypes in the *Ohia* mutant mice.

#### Reduced penetrance of BAV in *Pcdha9* mutant mice

We investigated penetrance of the BAV phenotype in the *Pcdha9<sup>m/m</sup>* mice, as familial studies have shown reduced penetrance for BAV and other LVOTO phenotypes. Analysis of E14.5 embryos showed over 25% of the *Pcdha9<sup>m/m</sup>* mutant mice have BAV, but this declined to approximately 20% in mutant mice found at postnatal day 1 (PN1) and was further reduced to 10% in adult *Pcdha9<sup>m/m</sup>* mice (Figures 3I–3K). This suggests mutant mice with BAV die neonatally/postnatally; whether this is due to complication of aortic valve disease or aortopathy or both is



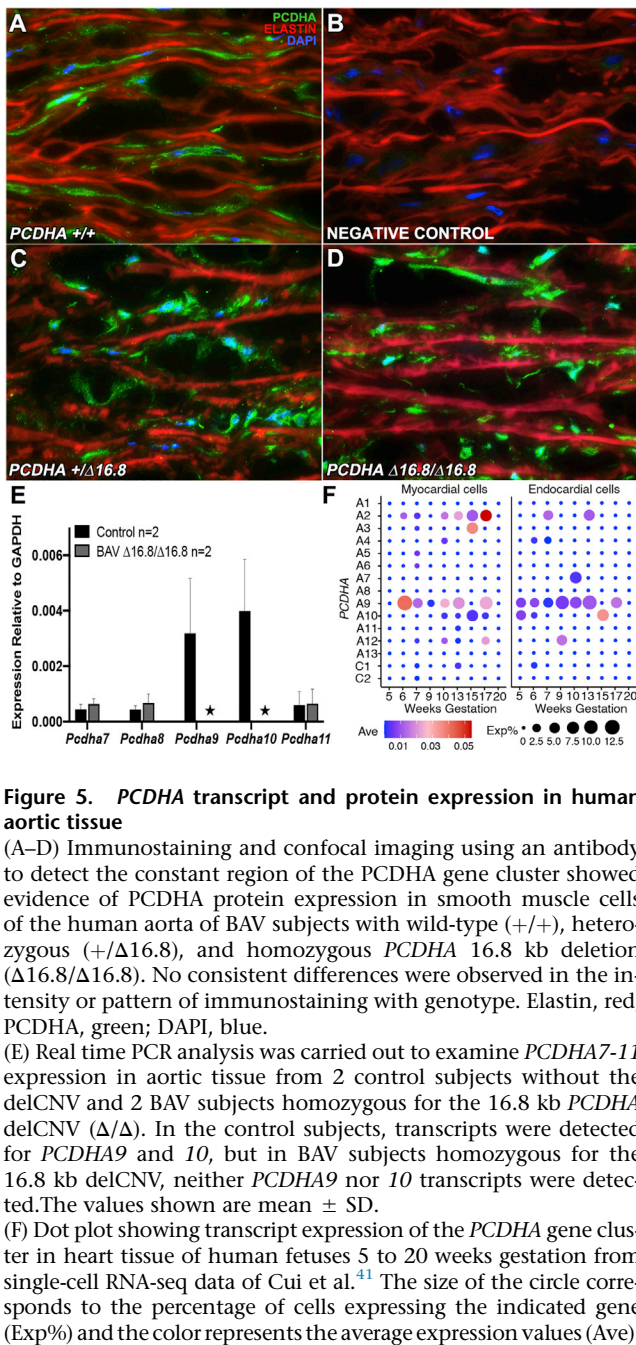

**Figure 5. PCDHA transcript and protein expression in human aortic tissue**

(A–D) Immunostaining and confocal imaging using an antibody to detect the constant region of the PCDHA gene cluster showed evidence of PCDHA protein expression in smooth muscle cells of the human aorta of BAV subjects with wild-type (+/+), heterozygous (+/Δ16.8), and homozygous PCDHA 16.8 kb deletion (Δ16.8/Δ16.8). No consistent differences were observed in the intensity or pattern of immunostaining with genotype. Elastin, red; PCDHA, green; DAPI, blue.

(E) Real time PCR analysis was carried out to examine PCDHA7–11 expression in aortic tissue from 2 control subjects without the delCNV and 2 BAV subjects homozygous for the 16.8 kb PCDHA delCNV (Δ/Δ). In the control subjects, transcripts were detected for PCDHA9 and 10, but in BAV subjects homozygous for the 16.8 kb delCNV, neither PCDHA9 nor 10 transcripts were detected. The values shown are mean ± SD.

(F) Dot plot showing transcript expression of the PCDHA gene cluster in heart tissue of human fetuses 5 to 20 weeks gestation from single-cell RNA-seq data of Cui et al.<sup>41</sup> The size of the circle corresponds to the percentage of cells expressing the indicated gene (Exp%) and the color represents the average expression values (Ave).

unknown. Given that abnormal epithelial-mesenchymal transition (EMT) has been observed in the aortic intima and media of individuals with BAV, and defects in EMT can cause cardiac valve abnormalities, we investigated whether *Pcdha9* deficiency may promote EMT.<sup>49–52</sup> For this analysis, we conducted *Pcdha9* siRNA-mediated gene knockdown in a well-characterized *in vitro* model of TGFβ-induced EMT in the mouse mammary epithelial cell line NMuMG.<sup>53</sup> *Pcdha9* gene knockdown in NMuMG cells caused marked induction of multiple EMT-associated genes, such as *Tgfb1*, *Tgfb2*, *Snail1*, *Notch1*, and *Postn* (Figure 3L). These findings suggest protocadherin deficiency can perturb EMT and thus potentially contribute

to defects in aortic valve development and/or in the adult onset of aortopathies.

### PCDHA expression in human aorta

We further examined PCDHA expression in human aortic tissue with confocal microscopy using the same PCDHA constant region antibody. This analysis included tissue from individuals that are wild type and individuals with BAV who are heterozygous or homozygous for the 16.8 kb PCDHA delCNV. Staining was observed in smooth muscle cells in the aortic media, but the level of immunostaining was highly variable, with no consistent correlation with genotypes (Figures 5A–5D). Given the antibody cannot discriminate between different genes within the PCDHA gene cluster, we also conducted real-time PCR analysis with RNA extracted from aorta tissue to assess PCDHA transcript expression. In wild-type individuals without the delCNV, transcript expression was observed for PCDHA9 and 10, but not for the flanking genes PCDHA7, 8, and 11 (Figure 5E). In contrast, in individuals with BAV homozygous for the 16.8 kb delCNV (Figure 5E), few or no transcripts were observed for any of these genes, including the three within the delCNV—PCDHA 8, 9, and 10 (Figure 5E). Using publicly available human single-cell RNaseq data, we examined PCDHA expression in human embryonic heart tissue spanning 5–20 weeks gestation. This analysis showed PCDHA9 as the predominant gene expressed from the PCDHA gene cluster (Figure 4F). This was observed both in cardiomyocytes and in endocardial cells of the developing human embryonic heart (Figure 5F).<sup>41</sup> While comparable scRNaseq data are not available for the human aorta or aortic valves (3' sequencing used for most scRNaseq precludes PCDHA gene identification), it is significant to note that upregulated expression of PCDHA9 has been documented in the human fetal aortic valve by bulk RNA sequencing analysis.<sup>54</sup> Together, these findings suggest PCDHA9, the predominant PCDHA gene expressed in the embryonic human aorta, is also expressed in the adult aorta.

### Discussion

We found two common delCNVs spanning the PCDHA gene cluster that are significantly associated with LVOTO, including BAV, CoA, and HLHS. This was observed in a large white cohort. Smaller Black and Chinese cohorts also showed trends for similar enrichment. These delCNVs were most prevalent in white individuals, less common in Black individuals and least common in Chinese individuals, similar to the racial prevalence for BAV. PCDHA was found to be highly expressed in the aortic media and cushion mesenchyme of mouse embryos. This expression was reduced in the *Pcdha* mutant mice, suggesting PCDHA deficiency or haploinsufficiency can contribute to maldevelopment of the aorta/aortic valve. Incomplete penetrance was observed in both the *Pcdha* mutant mice and

human subjects with the *PCDHA* delCNV. Together, these findings demonstrate common variants can contribute to the reduced penetrance and variable expressivity that characterize the complex genetics of rare LVOTO CHD.

In the discovery white cohort, the 13.6/16.8 kb delCNV combined, and the 13.6 kb or 16.8 kb delCNV independently, showed significant association with LVOTO. For the PCGC white cohort, only the rarer 13.6 kb delCNV showed significant association with LVOTO, while for the Chinese cohort, only the more common 16.8 kb delCNV showed significance. The significant association of the 13.6 kb delCNV in the smaller PCGC cohort likely reflects the increased statistical power associated with analysis of the rarer 13.6 kb delCNV. We note as the Framingham cohort used as control subjects in the PCGC analysis were not screened to exclude subjects with BAV, the background prevalence of BAV in these control subjects also may have reduced power.

#### **Generalizability of *PCDHA* delCNV association with LVOTO**

In the Chinese cohort, the very low prevalence of the *PCDHA* delCNVs overall may account for the significant association observed only for the more common 16.8 kb delCNV. In the Black cohort, the prevalence of the delCNV is intermediate between that of the white and Chinese cohorts, and only the combined 13.6/16.8 kb delCNV showed significant allelic association with LVOTO. However, the small sample size of the Black cohort is a major limitation and points to the need for more diversification in subject recruitment. Nevertheless, these findings support generalizability of the association of *PCDHA* delCNV with LVOTO.

#### **Role of the 13.6 kb and 16.8 kb *PCDHA* delCNV in LVOTO and aortopathy**

Our findings indicate the 13.6 and 16.8 kb *PCDHA* delCNVs both contribute to LVOTO and may have equivalent roles in LVOTO pathogenesis. These two delCNVs share the common deletion of coding exons for *PCDHA8* and *9*, but only *PCDHA9* is expressed in the human embryonic heart at the time of aorta/aortic valve formation.<sup>55</sup> Hence, it may be *PCDHA9* deficiency that contributes to LVOTO. However, in the adult human aorta, expression of both *PCDHA9* and *10* are observed. While both genes are deleted in the 16.8 kb delCNV, *PCDHA10* is unaffected by the 13.6 kb delCNV. This suggests only the 16.8 kb delCNV may contribute to aortopathy risk. Interestingly, in the clinic-based recruitment, all 5 individuals with the  $\Delta/\Delta$  delCNV genotype were homozygous for the 16.8 kb delCNV, three of whom had aneurysm.

#### **Role of *PCDHA* delCNV in common and rare LVOTOs**

We observed the *PCDHA* delCNVs in 21% of BAV and 20.5% of HLHS subjects in the white discovery cohort, showing these delCNVs are significant genetic factors contributing to one of the most common (BAV) and also

one of the rarer (HLHS) CHDs. This somewhat puzzling finding can be explained by a multigenic model of disease suggested by observations in the *Ohia* mutant mice and in human clinical findings.<sup>9,21</sup> In *Ohia* mutants, the *Pcdha9* mutation alone can cause BAV, while in conjunction with a second mutation HLHS can arise.<sup>21</sup> Hence, the common *PCDHA* delCNV can account for the high prevalence of BAV, while the requirement for a second hit may explain HLHS being rarer. Together, these findings suggest the genetic architecture of LVOTO may involve a role for the *PCDHA* delCNVs in mediating the common and rarer LVOTO phenotypes.

#### ***PCDHA* delCNV association with coarctation**

The *PCDHA* delCNV showed the highest OR for association with isolated CoA, with 50% of 22 individuals with CoA in the discovery cohort harboring the delCNV. However, this finding was not replicated in the PCGC cohort, indicating further studies are needed with larger number of CoA subjects. We note a recent Icelandic population study reported significant association of a rare missense variant in *MYH6* with isolated CoA. This missense variant was observed in 20% of 39 individuals with CoA, but penetrance was very low, with only one CoA individual noted per 123 carriers.<sup>20</sup> While the *PCDHA* delCNVs also show incomplete penetrance for LVOTO, penetrance is likely much higher than the *MYH6* variant if we assume 1% incidence of BAV and 10% prevalence for the delCNV.

#### **Protocadherin and the developmental etiology of BAV and aortopathy**

Our analysis in mouse embryos showed abundant *PCDHA* expression in the aortic smooth muscle cells of neural crest origin, a cell lineage derived from the neural tube with abundant protocadherin expression.<sup>56</sup> *PCDHA* expression was also observed in the aortic endothelial cells and cushion mesenchyme. In the *Pcdha9* mutant mouse embryos, significant reduction of the *PCDHA* protein expression was observed in the aortic cushion mesenchyme and smooth muscle cells in the aortic media. As endocardial EMT generates the cushion mesenchyme that forms the cardiac valve leaflets, dysregulated EMT could impact formation of the aortic valve leaflets. Supporting a role for *PCDHA* regulation of EMT, we showed abnormal activation of EMT-related marker gene expression upon *Pcdha9* gene knockdown in a well-described *in vitro* model of EMT. These findings suggest enhanced EMT from *PCDHA* deficiency can contribute to abnormal valvular morphogenesis and the emergence of bicuspid aortic valves.

Additionally, such dysregulated EMT in the aortic media could contribute to aortopathy with aorta dilation and risk of aortic aneurysm. Thus, several studies have reported the aortic intima and media of individuals with BAV have a maturation defect associated with an abnormal mesenchymal state.<sup>49,50,57</sup> Also notable is the report that pediatric individuals with BAV can exhibit aorta dilation early in life, even during fetal development, supporting a

developmental etiology for BAV-associated aortopathy.<sup>58,59</sup> Consistent with this, various studies have shown aortopathy can occur independent of hemodynamic disturbances (Dumitrascu-Biris et al., British Congenital Cardiac Association Annual Meeting, 2019).<sup>58,60,61</sup> Nevertheless, a study of pediatric individuals with BAV showed aortic stenosis and aortic insufficiency are independently associated with aorta dilation, suggesting the involvement of hemodynamic factors.<sup>58</sup> Based on our findings, we propose *PCDHA* deficiency may contribute to aortopathy risk via the disruption of cell-cell adhesion and enhanced EMT, processes that could be exacerbated by altered hemodynamics.

### Epigenetic regulation of the *PCDHA* gene cluster

The cause for the late age onset of aortopathy is not well understood, and without mechanistic insight, it has not been possible to predict which individuals with BAV will require valve replacement or aorta surgery. In this regard, it is interesting to note that the *PCDHA* gene cluster is well described to be epigenetically regulated by DNA methylation. As methylation of the *PCDHA* gene cluster is observed to increase with advancing age, this could contribute to the late age onset of aortopathy.<sup>62–64</sup> A role for epigenetics in LVOTO is supported by observations in Williams-Beuren syndrome (WBS [MIM: 609757]), a genetic disorder characterized by ~75% incidence of CHD that includes BAV and aortic stenosis.<sup>65,66</sup> WBS subjects show epigenetic disturbance with increased DNA methylation, including hypermethylation of *PCDHA9*, the predominant gene expressed in the aorta and during human heart development.<sup>65</sup> Thus, epigenetic modulation of the *PCDHA* locus also might contribute to the reduced penetrance of LVOTO and impact the risk of aortopathy.

### Common variants as disease-causing genes

Our pursuit of the possible role of common variants in the genetic etiology of CHD is informed by our mouse models showing *Pcdha* deficiency can cause BAV/LVOTO. Unlike common variants identified in GWAS, the common variants recovered in our study are likely pathogenic as a result of reduced protein expression, as seen in the *Pcdha* mutant mice. It should be noted that our study was not designed as a genome-wide study and does not surpass traditional genome-wide thresholds for significance. Rather, our study demonstrates the value of leveraging animal models to inform genetic studies in the clinical setting, where the larger sample sizes required for genome-wide analysis are often difficult or virtually impossible to acquire.

Interrogating the possible role of common variants in human disease is also inherently challenging. As such variants are not likely to be under strong selection, it is difficult to establish proper filtering criteria to distinguish signal from noise. Indeed, the loss-of-function intolerance index often used to assess the functional importance of gene loss predicted *PCDHA* gene loss would have little or no functional impact.<sup>67,68</sup> However, this index has been

shown to be uninformative for genes whose essential function does not impact reproductive fitness, as is the case for BAV, the most common LVOTO.<sup>68</sup> Also, possibly confounding analysis of common variants is the potential impact of ancestry on variant prevalence. We addressed this by using regional control subjects in the discovery cohort analysis and using WES data available for a small subset of the white discovery cohort to further ancestry match the white replication LVOTO (PCGC) and control (FHS) cohorts.

### Conclusions

The combined mouse and human studies provide strong evidence that common variants in a disease-causing gene can contribute to the genetic etiology of LVOTO. These studies also demonstrate a role for the *PCDHA* gene cluster in BAV and LVOTO. Our studies in mice suggest BAV and the risk of aortopathy associated with *PCDHA* deficiency may arise from the disturbance of cell-cell adhesion and enhanced EMT. The possible additional involvement of *PCDHA* methylation silencing may warrant further investigation.

### Data and code availability

Sequencing coverage for *PCDHA9* in the Pittsburgh cohort and in the region of the *PCDHA* delCNV for the Anzhen Hospital cohort are available under SRA accession numbers BioProject: PRJNA632119 and GSA: PRJCA002663, respectively. WES data from the PCGC and the FHS are accessible in NCBI dbGAP database under accession numbers dbGAP: phs001194.v2.p2 and phs000007.v30.p11, respectively. Single-cell RNA-seq data of human embryonic hearts are available from GEO database under accession number GEO: GSE106118.

### Supplemental information

Supplemental information can be found online at <https://doi.org/10.1016/j.xhgg.2021.100037>.

### Acknowledgments

We are indebted to all family members for their research participation and contribution to this project. We acknowledge Tara Paton from the Centre for Applied Genomics at the Hospital for Sick Children for assistance with *PCDHA9* genotyping of Canadian samples. This work was supported by NIH grants HL132024, HL142788 (C.W.L), HL109132 (T.G.G.), F30HD097967 (G.C.G.), and R01 HL109759-A1 and Nationwide Children's Hospital Foundation (K.L.M.), Ted Rogers Centre for Heart Research (S.M.), and Heart and Stroke Foundation of Canada/Robert M. Freedom Chair (S.M.). Additional support was provided by start-up funds to P.T. from the Chinese University of Hong Kong.

### Declaration of interests

The authors declare no competing interests.

Received: January 22, 2021

Accepted: May 21, 2021

## Web resources

BioProject, <https://www.ncbi.nlm.nih.gov/bioproject/>  
dbGAP, <https://www.ncbi.nlm.nih.gov/gap/>  
GEO, <https://www.ncbi.nlm.nih.gov/geo/>  
GSA, <https://bigd.big.ac.cn/gsa-human/>  
OMIM, <https://www.omim.org>  
1000 genome project, [ftp://ftp.1000genomes.ebi.ac.uk/vol1/ftp//data\\_collections/1000G\\_2504\\_high\\_coverage/working](ftp://ftp.1000genomes.ebi.ac.uk/vol1/ftp//data_collections/1000G_2504_high_coverage/working)

## References

1. Siu, S.C., and Silversides, C.K. (2010). Bicuspid aortic valve disease. *J. Am. Coll. Cardiol.* *55*, 2789–2800.
2. Wu, B., Wang, Y., Xiao, F., Butcher, J.T., Yutzey, K.E., and Zhou, B. (2017). Developmental Mechanisms of Aortic Valve Malformation and Disease. *Annu. Rev. Physiol.* *79*, 21–41.
3. Borger, M.A., Fedak, P.W.M., Stephens, E.H., Gleason, T.G., Girdauskas, E., Ikonomidis, J.S., Khojnehzad, A., Siu, S.C., Verma, S., Hope, M.D., et al. (2018). The American Association for Thoracic Surgery consensus guidelines on bicuspid aortic valve-related aortopathy: Full online-only version. *J. Thorac. Cardiovasc. Surg.* *156*, e41–e74.
4. Michelena, H.I., Khanna, A.D., Mahoney, D., Margaryan, E., Topilsky, Y., Suri, R.M., Eidem, B., Edwards, W.D., Sundt, T.M., 3rd, and Enriquez-Sarano, M. (2011). Incidence of aortic complications in patients with bicuspid aortic valves. *JAMA* *306*, 1104–1112.
5. Yassine, N.M., Shahram, J.T., and Body, S.C. (2017). Pathogenic mechanisms of bicuspid aortic valve aortopathy. *Front. Physiol.* *8*, 687.
6. Duran, A.C., Frescura, C., Sans-Coma, V., Angelini, A., Basso, C., and Thiene, G. (1995). Bicuspid aortic valves in hearts with other congenital heart disease. *J. Heart Valve Dis.* *4*, 581–590.
7. Lewin, M.B., McBride, K.L., Pignatelli, R., Fernbach, S., Combes, A., Menesses, A., Lam, W., Bezold, L.I., Kaplan, N., Towbin, J.A., and Belmont, J.W. (2004). Echocardiographic evaluation of asymptomatic parental and sibling cardiovascular anomalies associated with congenital left ventricular outflow tract lesions. *Pediatrics* *114*, 691–696.
8. Cripe, L., Andelfinger, G., Martin, L.J., Shooner, K., and Benson, D.W. (2004). Bicuspid aortic valve is heritable. *J. Am. Coll. Cardiol.* *44*, 138–143.
9. McBride, K.L., Pignatelli, R., Lewin, M., Ho, T., Fernbach, S., Menesses, A., Lam, W., Leal, S.M., Kaplan, N., Schliekelman, P., et al. (2005). Inheritance analysis of congenital left ventricular outflow tract obstruction malformations: Segregation, multiplex relative risk, and heritability. *Am. J. Med. Genet. A.* *134A*, 180–186.
10. Liu, Y., Chen, S., Zühlke, L., Black, G.C., Choy, M.-K., Li, N., and Keavney, B.D. (2019). Global birth prevalence of congenital heart defects 1970–2017: updated systematic review and meta-analysis of 260 studies. *Int. J. Epidemiol.* *48*, 455–463.
11. Benson, D.W., Martin, L.J., and Lo, C.W. (2016). Genetics of hypoplastic left heart syndrome. *J. Pediatr.* *173*, 25–31.
12. Hinton, R.B., Martin, L.J., Rame-Gowda, S., Tabangin, M.E., Cripe, L.H., and Benson, D.W. (2009). Hypoplastic left heart syndrome links to chromosomes 10q and 6q and is genetically related to bicuspid aortic valve. *J. Am. Coll. Cardiol.* *53*, 1065–1071.
13. Martin, L.J., Ramachandran, V., Cripe, L.H., Hinton, R.B., Andelfinger, G., Tabangin, M., Shooner, K., Keddache, M., and Benson, D.W. (2007). Evidence in favor of linkage to human chromosomal regions 18q, 5q and 13q for bicuspid aortic valve and associated cardiovascular malformations. *Hum. Genet.* *121*, 275–284.
14. McBride, K.L., Zender, G.A., Fitzgerald-Butt, S.M., Koehler, D., Menesses-Diaz, A., Fernbach, S., Lee, K., Towbin, J.A., Leal, S., and Belmont, J.W. (2009). Linkage analysis of left ventricular outflow tract malformations (aortic valve stenosis, coarctation of the aorta, and hypoplastic left heart syndrome). *Eur. J. Hum. Genet.* *17*, 811–819.
15. Garg, V., Muth, A.N., Ransom, J.F., Schluterman, M.K., Barnes, R., King, I.N., Grossfeld, P.D., and Srivastava, D. (2005). Mutations in NOTCH1 cause aortic valve disease. *Nature* *437*, 270–274.
16. Bonachea, E.M., Chang, S.-W., Zender, G., LaHaye, S., Fitzgerald-Butt, S., McBride, K.L., and Garg, V. (2014). Rare GATA5 sequence variants identified in individuals with bicuspid aortic valve. *Pediatr. Res.* *76*, 211–216.
17. Gould, R.A., Aziz, H., Woods, C.E., Seman-Senderos, M.A., Sparks, E., Preuss, C., Wünnemann, F., Bedja, D., Moats, C.R., McClymont, S.A., et al.; Baylor-Hopkins Center for Mendelian Genomics; and MIBAVA Leducq Consortium (2019). ROBO4 variants predispose individuals to bicuspid aortic valve and thoracic aortic aneurysm. *Nat. Genet.* *51*, 42–50.
18. McKellar, S.H., Tester, D.J., Yagubyan, M., Majumdar, R., Ackerman, M.J., and Sundt, T.M., 3rd. (2007). Novel NOTCH1 mutations in patients with bicuspid aortic valve disease and thoracic aortic aneurysms. *J. Thorac. Cardiovasc. Surg.* *134*, 290–296.
19. Tan, H.L., Glen, E., Töpf, A., Hall, D., O’Sullivan, J.J., Sneddon, L., Wren, C., Avery, P., Lewis, R.J., ten Dijke, P., et al. (2012). Nonsynonymous variants in the SMAD6 gene predispose to congenital cardiovascular malformation. *Hum. Mutat.* *33*, 720–727.
20. Bjornsson, T., Thorolfsson, R.B., Sveinbjornsson, G., Sulem, P., Norddahl, G.L., Helgadóttir, A., Gretarsdóttir, S., Magnúsdóttir, A., Danielsen, R., Sigurdsson, E.L., et al. (2018). A rare missense mutation in MYH6 associates with non-syndromic coarctation of the aorta. *Eur. Heart J.* *39*, 3243–3249.
21. Liu, X., Yagi, H., Saeed, S., Bais, A.S., Gabriel, G.C., Chen, Z., Peterson, K.A., Li, Y., Schwartz, M.C., Reynolds, W.T., et al. (2017). The complex genetics of hypoplastic left heart syndrome. *Nat. Genet.* *49*, 1152–1159.
22. Yagi, H., Liu, X., Gabriel, G.C., Wu, Y., Peterson, K., Murray, S.A., Aronow, B.J., Martin, L.J., Benson, D.W., and Lo, C.W. (2018). The Genetic Landscape of Hypoplastic Left Heart Syndrome. *Pediatr. Cardiol.* *39*, 1069–1081.
23. Noonan, J.P., Li, J., Nguyen, L., Caoile, C., Dickson, M., Greenwood, J., Schmutz, J., Feldman, M.W., and Myers, R.M. (2003). Extensive linkage disequilibrium, a common 16.7-kilobase deletion, and evidence of balancing selection in the human protocadherin  $\alpha$  cluster. *Am. J. Hum. Genet.* *72*, 621–635.
24. Chandra, S., Lang, R.M., Nicolarsen, J., Gayat, E., Spencer, K.T., Mor-Avi, V., and Hofmann Bowman, M.A. (2012). Bicuspid aortic valve: inter-racial difference in frequency and aortic dimensions. *JACC Cardiovasc. Imaging* *5*, 981–989.
25. Li, Y., Wei, X., Zhao, Z., Liao, Y., He, J., Xiong, T., Xu, Y., Lv, W., Ou, Y., Tang, H., et al. (2017). Prevalence and complications of bicuspid aortic valve in Chinese according to echocardiographic database. *Am. J. Cardiol.* *120*, 287–291.
26. Gelb, B., Brueckner, M., Chung, W., Goldmuntz, E., Kaltman, J., Kaski, J.P., Kim, R., Kline, J., Mercer-Rosa, L., Porter, G.,

- et al.; Pediatric Cardiac Genomics Consortium (2013). The Congenital Heart Disease Genetic Network Study: rationale, design, and early results. *Circ. Res.* *112*, 698–706.
27. Homsy, J., Zaidi, S., Shen, Y., Ware, J.S., Samocha, K.E., Karczewski, K.J., DePalma, S.R., McKean, D., Wakimoto, H., Gorham, J., et al. (2015). De novo mutations in congenital heart disease with neurodevelopmental and other congenital anomalies. *Science* *350*, 1262–1266.
  28. Tsao, C.W., and Vasan, R.S. (2015). Cohort Profile: The Framingham Heart Study (FHS): overview of milestones in cardiovascular epidemiology. *Int. J. Epidemiol.* *44*, 1800–1813.
  29. Poplin, R., Ruano-Rubio, V., DePristo, M.A., Fennell, T.J., Carneiro, M.O., Van der Auwera, G.A., Kling, D.E., Gauthier, L.D., Levy-Moonshine, A., Roazen, D., et al. (2017). Scaling accurate genetic variant discovery to tens of thousands of samples. *bioRxiv*. <https://doi.org/10.1101/201178>.
  30. Li, H. (2013). Aligning sequence reads, clone sequences and assembly contigs with BWA-MEM. *arXiv*, arXiv:1303.3997. <https://arxiv.org/abs/1303.3997>.
  31. Van der Auwera, G.A., Carneiro, M.O., Hartl, C., Poplin, R., Del Angel, G., Levy-Moonshine, A., Jordan, T., Shakir, K., Roazen, D., Thibault, J., et al. (2013). From FastQ data to high-confidence variant calls: the genome analysis toolkit best practices pipeline. *Curr. Protoc. Bioinformatics* *43*, 11.10.1–11.10.33.
  32. Purcell, S., Neale, B., Todd-Brown, K., Thomas, L., Ferreira, M.A., Bender, D., Maller, J., Sklar, P., de Bakker, P.I., Daly, M.J., and Sham, P.C. (2007). PLINK: a tool set for whole-genome association and population-based linkage analyses. *Am. J. Hum. Genet.* *81*, 559–575.
  33. Luo, Y., de Lange, K.M., Jostins, L., Moutsianas, L., Randall, J., Kennedy, N.A., Lamb, C.A., McCarthy, S., Ahmad, T., Edwards, C., et al. (2017). Exploring the genetic architecture of inflammatory bowel disease by whole-genome sequencing identifies association at ADCY7. *Nat. Genet.* *49*, 186–192.
  34. Auton, A., Brooks, L.D., Durbin, R.M., Garrison, E.P., Kang, H.M., Korbel, J.O., Marchini, J.L., McCarthy, S., McVean, G.A., Abecasis, G.R.; and 1000 Genomes Project Consortium (2015). A global reference for human genetic variation. *Nature* *526*, 68–74.
  35. Karczewski, K.J., Francioli, L.C., Tiao, G., Cummings, B.B., Alfoldi, J., Wang, Q., Collins, R.L., Laricchia, K.M., Ganna, A., Birnbaum, D.P., et al.; Genome Aggregation Database Consortium (2020). The mutational constraint spectrum quantified from variation in 141,456 humans. *Nature* *581*, 434–443.
  36. Price, A.L., Patterson, N.J., Plenge, R.M., Weinblatt, M.E., Shadick, N.A., and Reich, D. (2006). Principal components analysis corrects for stratification in genome-wide association studies. *Nat. Genet.* *38*, 904–909.
  37. Patterson, N., Price, A.L., and Reich, D. (2006). Population structure and eigenanalysis. *PLoS Genet.* *2*, e190.
  38. Wang, K., Li, M., and Hakonarson, H. (2010). ANNOVAR: functional annotation of genetic variants from high-throughput sequencing data. *Nucleic Acids Res.* *38*, e164.
  39. Liu, X., Jian, X., and Boerwinkle, E. (2013). dbNSFP v2.0: a database of human non-synonymous SNVs and their functional predictions and annotations. *Hum. Mutat.* *34*, E2393–E2402.
  40. Schneider, C.A., Rasband, W.S., and Eliceiri, K.W. (2012). NIH Image to ImageJ: 25 years of image analysis. *Nat. Methods* *9*, 671–675.
  41. Cui, Y., Zheng, Y., Liu, X., Yan, L., Fan, X., Yong, J., Hu, Y., Dong, J., Li, Q., Wu, X., et al. (2019). Single-Cell Transcriptome Analysis Maps the Developmental Track of the Human Heart. *Cell Rep.* *26*, 1934–1950, e5.
  42. Ripley, B.D. (2002). *Modern applied statistics with S* (Springer).
  43. Wu, Q., and Maniatis, T. (1999). A striking organization of a large family of human neural cadherin-like cell adhesion genes. *Cell* *97*, 779–790.
  44. Miller-Hance, W.C., and Tacy, T.A. (2004). Gender differences in pediatric cardiac surgery: the cardiologist's perspective. *J. Thorac. Cardiovasc. Surg.* *128*, 7–10.
  45. Canzio, D., and Maniatis, T. (2019). The generation of a protocadherin cell-surface recognition code for neural circuit assembly. *Curr. Opin. Neurobiol.* *59*, 213–220.
  46. Esumi, S., Kakazu, N., Taguchi, Y., Hirayama, T., Sasaki, A., Hirabayashi, T., Koide, T., Kitsukawa, T., Hamada, S., and Yagi, T. (2005). Monoallelic yet combinatorial expression of variable exons of the protocadherin- $\alpha$  gene cluster in single neurons. *Nat. Genet.* *37*, 171–176.
  47. Chen, W.V., and Maniatis, T. (2013). Clustered protocadherins. *Development* *140*, 3297–3302.
  48. Ing-Esteves, S., Kostadinov, D., Marocha, J., Sing, A.D., Joseph, K.S., Laboulaye, M.A., Sanes, J.R., and Lefebvre, J.L. (2018). Combinatorial effects of alpha-and gamma-protocadherins on neuronal survival and dendritic self-avoidance. *J. Neurosci.* *38*, 2713–2729.
  49. Maleki, S., Kjellqvist, S., Paloschi, V., Magné, J., Branca, R.M., Du, L., Hultenby, K., Petrini, J., Fuxe, J., Lehtio, J., et al.; MIBAVA Leducq Consortium (2016). Mesenchymal state of intimal cells may explain higher propensity to ascending aortic aneurysm in bicuspid aortic valves. *Sci. Rep.* *6*, 35712.
  50. Maleki, S., Poujade, F.A., Bergman, O., Gådin, J.R., Simon, N., Lång, K., Franco-Cereceda, A., Body, S.C., Björck, H.M., and Eriksson, P. (2019). Endothelial/Epithelial Mesenchymal Transition in Ascending Aortas of Patients With Bicuspid Aortic Valve. *Front. Cardiovasc. Med.* *6*, 182.
  51. Fischer, A., Steidl, C., Wagner, T.U., Lang, E., Jakob, P.M., Friedl, P., Knobloch, K.-P., and Gessler, M. (2007). Combined loss of Hey1 and HeyL causes congenital heart defects because of impaired epithelial to mesenchymal transition. *Circ. Res.* *100*, 856–863.
  52. Kostina, A.S., Uspensky, V.E., Irtyuga, O.B., Ignatieva, E.V., Freylikhman, O., Gavriulik, N.D., Moiseeva, O.M., Zhuk, S., Tomilin, A., Kostareva, A.A., and Malashicheva, A.B. (2016). Notch-dependent EMT is attenuated in patients with aortic aneurysm and bicuspid aortic valve. *Biochim. Biophys. Acta* *1862*, 733–740.
  53. Zhang, J., Tian, X.-J., Zhang, H., Teng, Y., Li, R., Bai, F., Elankumar, S., and Xing, J. (2014). TGF- $\beta$ -induced epithelial-to-mesenchymal transition proceeds through stepwise activation of multiple feedback loops. *Sci. Signal.* *7*, ra91.
  54. Gottlieb Sen, D., Halu, A., Razaque, A., Gorham, J.M., Hartnett, J., Seidman, J.G., Aikawa, E., and Seidman, C.E. (2018). The Transcriptional Signature of Growth in Human Fetal Aortic Valve Development. *Ann. Thorac. Surg.* *106*, 1834–1840.
  55. Dhanantwari, P., Lee, E., Krishnan, A., Samtani, R., Yamada, S., Anderson, S., Lockett, E., Donofrio, M., Shiota, K., Leatherbury, L., and Lo, C.W. (2009). Human cardiac development in the first trimester: a high-resolution magnetic resonance

- imaging and episcopic fluorescence image capture atlas. *Circulation* *120*, 343–351.
56. Sawada, H., Rateri, D.L., Moorlegghen, J.J., Majesky, M.W., and Daugherty, A. (2017). Smooth muscle cells derived from second heart field and cardiac neural crest reside in spatially distinct domains in the media of the ascending aorta—brief report. *Arterioscler. Thromb. Vasc. Biol.* *37*, 1722–1726.
  57. Grewal, N., Gittenberger-de Groot, A.C., Poelmann, R.E., Klautz, R.J., Lindeman, J.H., Goumans, M.-J., Palmen, M., Mohamed, S.A., Sievers, H.-H., Bogers, A.J., and DeRuiter, M.C. (2014). Ascending aorta dilation in association with bicuspid aortic valve: a maturation defect of the aortic wall. *J. Thorac. Cardiovasc. Surg.* *148*, 1583–1590.
  58. Grattan, M., Prince, A., Rumman, R.K., Morgan, C., Petrovic, M., Hauck, A., Young, L., Franco-Cereceda, A., Loeys, B., Mohamed, S.A., et al. (2020). Predictors of Bicuspid Aortic Valve-Associated Aortopathy in Childhood: A Report From the MI-BAVA Consortium. *Circ. Cardiovasc. Imaging* *13*, e009717.
  59. Simpson, J.M., and Pushparajah, K. (2020). Dilatation of the Aorta in Bicuspid Aortic Valve Disease. *Circ. Cardiovasc. Imaging* *13*, e010448.
  60. Yasuda, H., Nakatani, S., Stugaard, M., Tsujita-Kuroda, Y., Bando, K., Kobayashi, J., Yamagishi, M., Kitakaze, M., Kitamura, S., and Miyatake, K. (2003). Failure to prevent progressive dilation of ascending aorta by aortic valve replacement in patients with bicuspid aortic valve: comparison with tricuspid aortic valve. *Circulation* *108* (Suppl 1), II291–II294.
  61. Grewal, N., Girdauskas, E., DeRuiter, M., Goumans, M.J., Poelmann, R.E., Klautz, R.J.M., and Gittenberger-de Groot, A.C. (2019). The role of hemodynamics in bicuspid aortopathy: a histopathologic study. *Cardiovasc. Pathol.* *41*, 29–37.
  62. Toyoda, S., Kawaguchi, M., Kobayashi, T., Tarusawa, E., Toyama, T., Okano, M., Oda, M., Nakauchi, H., Yoshimura, Y., Sanbo, M., et al. (2014). Developmental epigenetic modification regulates stochastic expression of clustered protocadherin genes, generating single neuron diversity. *Neuron* *82*, 94–108.
  63. Lomvardas, S., and Maniatis, T. (2016). Histone and DNA Modifications as Regulators of Neuronal Development and Function. *Cold Spring Harb. Perspect. Biol.* *8*, a024208.
  64. Kim, S., Wyckoff, J., Morris, A.-T., Succop, A., Avery, A., Duncan, G.E., and Jazwinski, S.M. (2018). DNA methylation associated with healthy aging of elderly twins. *Geroscience* *40*, 469–484.
  65. Strong, E., Butcher, D.T., Singhania, R., Mervis, C.B., Morris, C.A., De Carvalho, D., Weksberg, R., and Osborne, L.R. (2015). Symmetrical dose-dependent DNA-methylation profiles in children with deletion or duplication of 7q11.23. *Am. J. Hum. Genet.* *97*, 216–227.
  66. Collins, R.T., 2nd. (2013). Cardiovascular disease in Williams syndrome. *Circulation* *127*, 2125–2134.
  67. Lek, M., Karczewski, K.J., Minikel, E.V., Samocha, K.E., Banks, E., Fennell, T., O'Donnell-Luria, A.H., Ware, J.S., Hill, A.J., Cummings, B.B., et al.; Exome Aggregation Consortium (2016). Analysis of protein-coding genetic variation in 60,706 humans. *Nature* *536*, 285–291.
  68. Ziegler, A., Colin, E., Goudenège, D., and Bonneau, D. (2019). A snapshot of some pLI score pitfalls. *Hum. Mutat.* *40*, 839–841.

## Supplemental information

### **Common deletion variants causing protocadherin- $\alpha$ deficiency contribute to the complex genetics of BAV and left-sided congenital heart disease**

**Polakit Teekakirikul, Wenjuan Zhu, George C. Gabriel, Cullen B. Young, Kyliia Williams, Lisa J. Martin, Jennifer C. Hill, Tara Richards, Marie Billaud, Julie A. Phillippi, Jianbin Wang, Yijen Wu, Tuantuan Tan, William Devine, Jiuann-huey Lin, Abha S. Bais, Jonathan Klonowski, Anne Moreau de Bellaing, Ankur Saini, Michael X. Wang, Leonid Emerel, Nathan Salamacha, Samuel K. Wyman, Carrie Lee, Hung Sing Li, Anastasia Miron, Jingyu Zhang, Jianhua Xing, Dennis M. McNamara, Erik Funz, Paul Kirshbom, William Mahle, Lazaros K. Kochilas, Yihua He, Vidu Garg, Peter White, Kim L. McBride, D. Woodrow Benson, Thomas G. Gleason, Seema Mital, and Cecilia W. Lo**

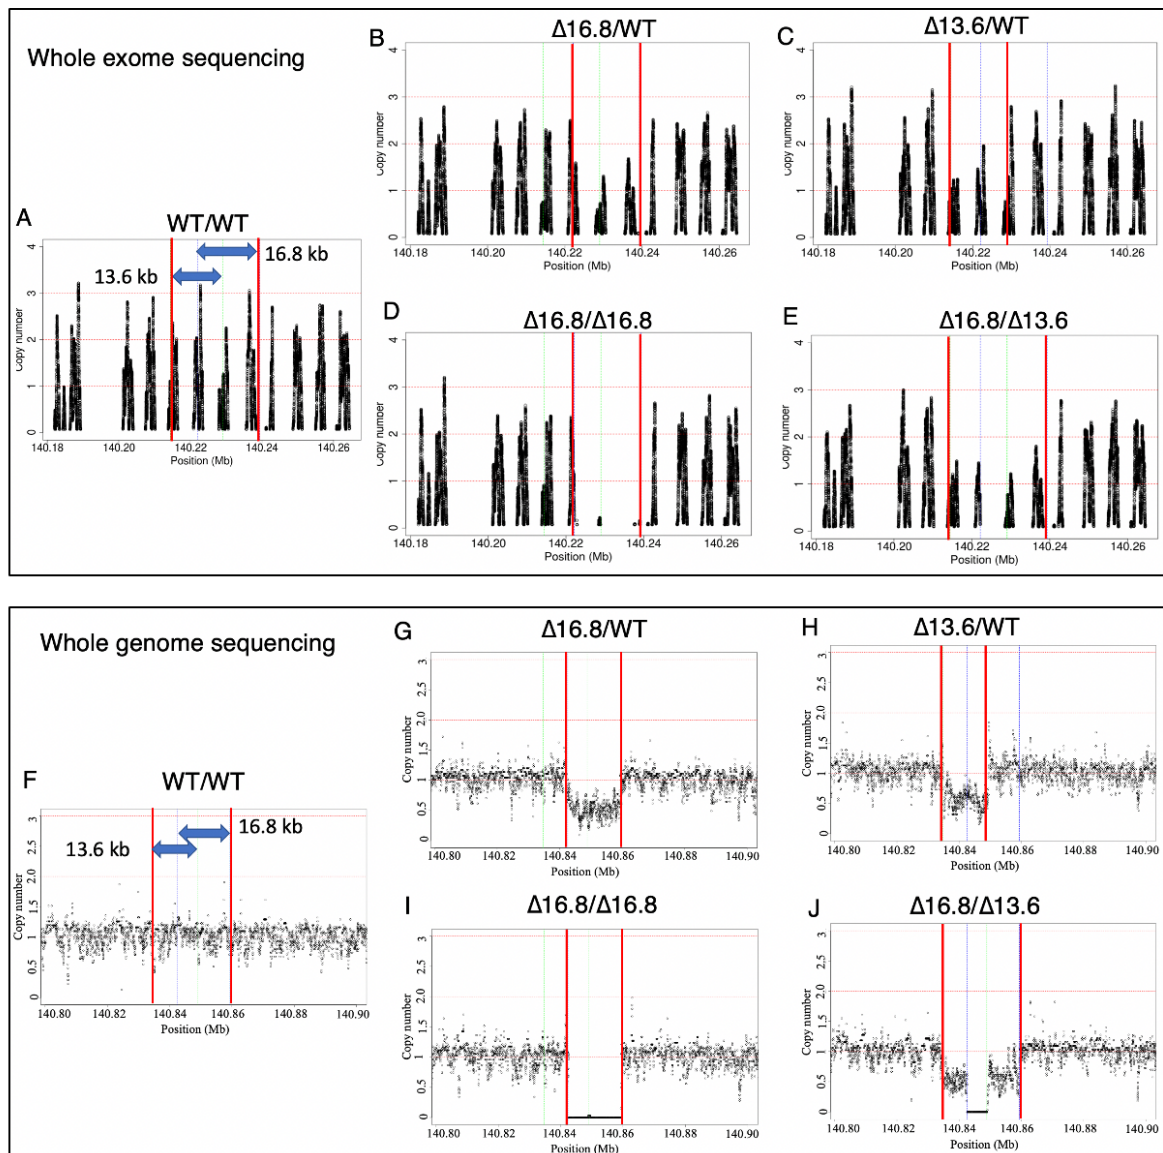

**Figure S1. Read depths in the *PCHDA* gene cluster allow determination of *PCHDA* delCNV genotypes from WES and WGS data**

Shown are WES (A) and WGS (F) read depths over the region spanning the 13.6 kb and 16.8 kb *PCHDA8-10* deletion interval in an individual with wildtype *PCHDA* genotype. Blue double arrows denote region comprising the *PCHDA7-9* interval. The red line delineate the boundary of the 13.6/16.8 kb delCNV. In (B-E) are examples of read depth in the WES data and (G-J) WGS data representing the different *PCHDA* delCNV genotypes as indicated. The red lines denote the boundary of the deletions associated with the 16.8 or 13.6 kb *PCHDA* delCNVs. Note the complete absence of reads in individuals homozygous for the 16.8 kb delCNV. No individuals are found homozygous for the 13.6 kb delCNV, as the 13.6 kb delCNV are much more rare. Note coordinates of 13.6kb (nsv4684081) and 16.8kb (nsv4655880) deletion are chr5:140214374-140228422 and chr5:140222140-140238927 in human genome GRCh37 reference or chr5:140834789-140848837 and chr5:140842555-140859342 in human genome GRCh38/hg38 reference.



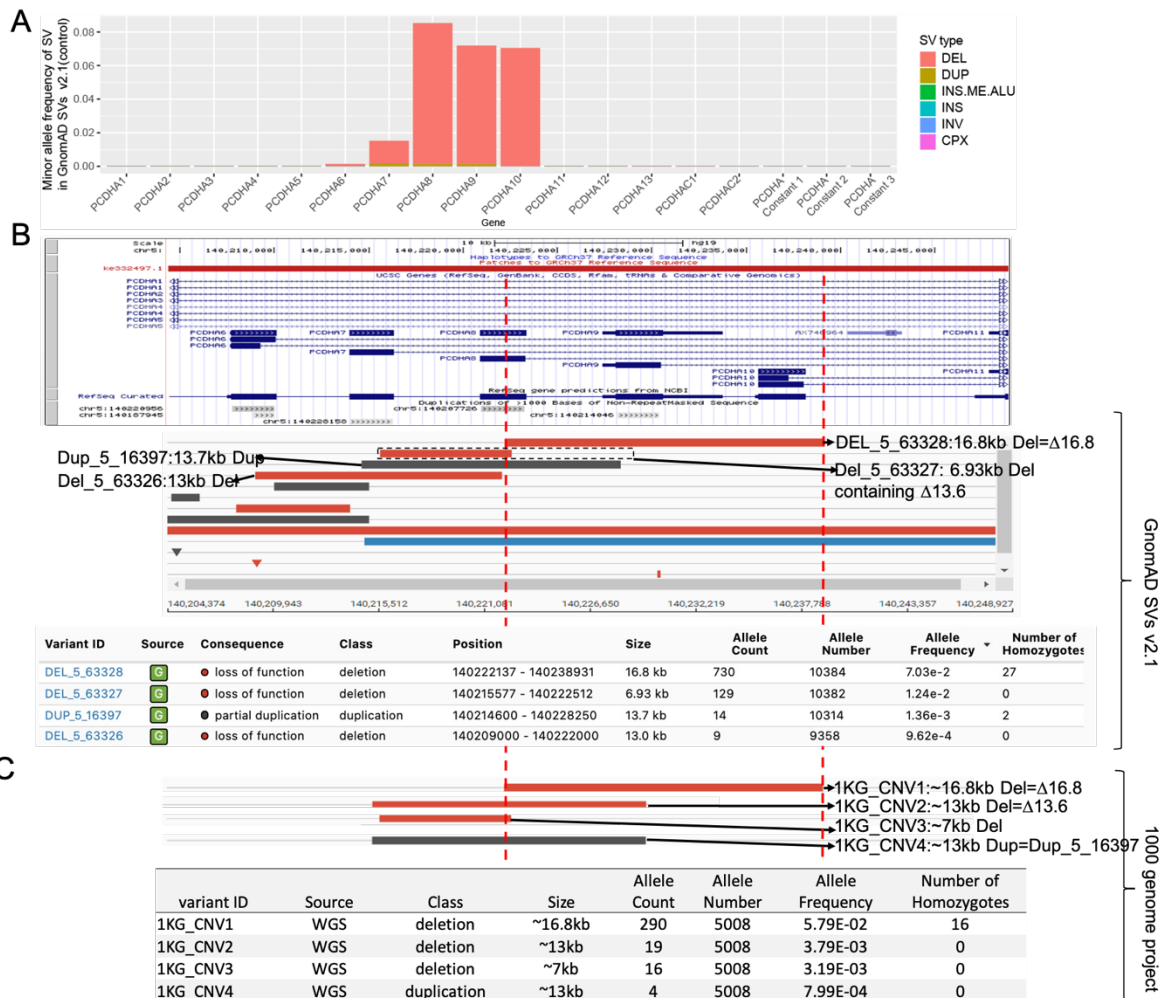

**Figure S2. CNV in *PCDHA* gene cluster detected in GnomAD and 1KG database.**

The two common delCNVs in the *PCDHA* gene cluster analyzed in our study comprise:  $\Delta$ 16.8kb deletion (nsv4655880) and  $\Delta$ 13.6kb deletion (nsv4684081). The coordinates of the  $\Delta$ 16.8kb and  $\Delta$ 13.6kb (hg19) delCNV correspond to chr5:140222140-140238927 and chr5:140214374-140228422 (or chr5:140215019-140229049), respectively. For  $\Delta$ 13.6kb, precise breakpoints cannot be identified due to segmental duplications around 5' and 3' breakpoints of the 13.6kb delCNV.

(A) Minor allele frequency of structural variants (SVs) from GnomAD SVs v2.1 control database (5,192 samples) for *PCDHA* gene family. This shows *A7*, *A8*, *A9* and *A10* genes in the *PCDHA* cluster are prone to deletion. DEL: Deletion; DUP: Duplication; INS: Insertion; INV: Inversion; CPX: Complex SV; INS:ME:ALU: Alu element insertion.

(B) Allele-frequency for top 4 SVs from GnomAD SV v2.1 control database (Collins et al. <sup>1</sup>) covering *PCDHA7-PCDHA10*. SV image and variant information were downloaded from

GnomAD Browser:

[https://gnomad.broadinstitute.org/gene/ENSG00000204962?dataset=gnomad\\_sv\\_r2\\_1\\_controls](https://gnomad.broadinstitute.org/gene/ENSG00000204962?dataset=gnomad_sv_r2_1_controls).

(C) Allele-frequency for top 4 SVs in *PCDHA* cluster from 1000 genome project (1KG). 1KG 2504 high coverage whole genome sequencing (WGS) data (~30X) from the New York Genome Center was used to manually identify the del CNVs. The 16.8kb deletion CNV (DEL\_5\_63328 in GnomAD, 1KG\_CNV1 in 1KG and nsv4655880 in dbVAR) was common in both GnomAD and 1KG database. A ~7kb deletion (DEL\_5\_63327) common in each population in GnomAD database likely encompasses multiple SVs, including the ~13.6 kb deletion (1KG\_CNV2 in 1KG= $\Delta$ 13.6kb, nsv4684081 in dbVAR, covering *PCDHA7*, *PCDHA8* and *PCDHA9*), as this 7kb deletion (MAF=0.0121) is only found in African population in 1000 genome project, and ~13.6kb deletion is a variant (MAF=0.0119) found mostly only in European population in 1000 genome project. The issue noted here is likely related to the limitation of the three software used for SV detection comprising cn.MOPS (Klambauer et al. <sup>2</sup>), Manta (Chen et al. <sup>3</sup>) and DELLY (Rausch et al. <sup>4</sup>).

1. Collins, R.L., Brand, H., Karczewski, K.J., Zhao, X., Alföldi, J., Francioli, L.C., Khera, A.V., Lowther, C., Gauthier, L.D., Wang, H., et al. (2020). A structural variation reference for medical and population genetics. *Nature* 581, 444-451.
2. Klambauer, G., Schwarzbauer, K., Mayr, A., Clevert, D.A., Mitterecker, A., Bodenhofer, U., and Hochreiter, S. (2012). cn.MOPS: mixture of Poissons for discovering copy number variations in next-generation sequencing data with a low false discovery rate. *Nucleic Acids Res* 40, e69.
3. Chen, X., Schulz-Trieglaff, O., Shaw, R., Barnes, B., Schlesinger, F., Kallberg, M., Cox, A.J., Kruglyak, S., and Saunders, C.T. (2016). Manta: rapid detection of structural variants and indels for germline and cancer sequencing applications. *Bioinformatics* 32, 1220-1222.
4. Rausch, T., Zichner, T., Schlattl, A., Stutz, A.M., Benes, V., and Korbel, J.O. (2012). DELLY: structural variant discovery by integrated paired-end and split-read analysis. *Bioinformatics* 28, i333-i339.

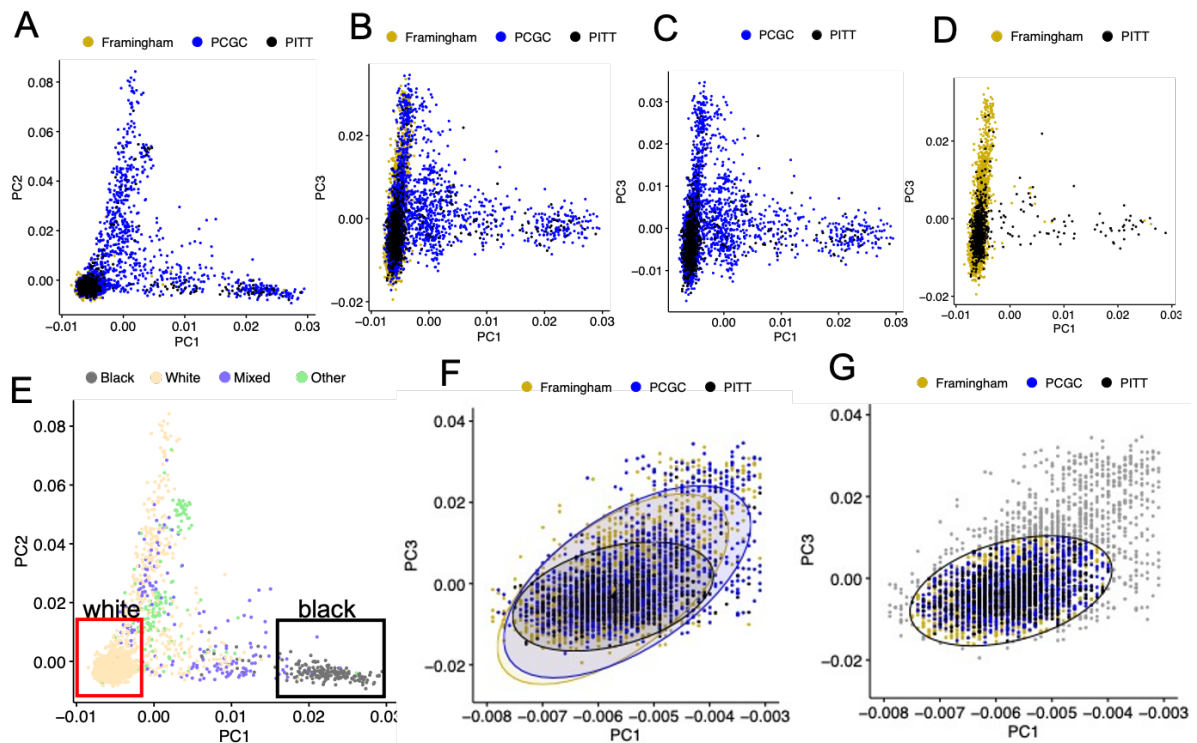

**Figure S3. Ancestry matching with principal component analysis**

(A-D) PCA plots of WES data from PCGC and Pittsburgh patients and Framingham control subjects. PC1 and PC2 are shown in (A), while PC3 and PC1 are shown in (B-D). Analysis along PC3 show tight clustering of Pittsburgh patients (D) as compared to the PCGC (C) and Framingham cohorts (B).

(E) Same PCA plot as in (A) except self declared ancestry is indicated (black, white, mixed, other). “Other” includes Hispanics, Asians, American Indian, etc. and “Mixed” refers to mixed racial background. The patients included in the red box comprise the subpopulation of white subjects from Pittsburgh, Framingham and PCGC that were further stratified along PC3 in the PC3/PC1 plot in (F,G). The black box comprise black subjects from PCGC and Pittsburgh.

(F,G) The three ellipses shown in (F) delineate the centroid for white subjects in each of the three cohorts - Pittsburgh (black), PCGC (blue), and Framingham (gold). The black ellipse comprising most of the white subjects from Pittsburgh (F) were used for ancestry matching the white subjects from the PCGC and Framingham cohorts. Shown in Panel G are the ancestry matched white patients from all three cohorts used for the *PCDHA* delCNV analyses.
